# Supplementary material for: Investigation of a safety-engineered device to prevent needlestick injury: why has not StatLock stuck?
Source: PubMed Central journal article supplement — BMJ Open. 2013 Apr 23;3(4):e002327. doi: 10.1136/bmjopen-2012-002327 (PMC3641494; doi:10.1136/bmjopen-2012-002327), 2013-04-23
Supplement: bmjopen-2012-002327.draft_revisions.pdf [file bmjopen-2012-002327.draft_revisions.pdf]

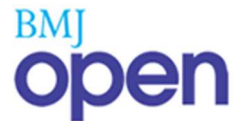

**Investigation of a safety-engineered device to prevent  
needlestick injury:  
Why hasn't StatLock stuck? A Pilot Study**

|                                 |                                                                                                                                                                                                                                                                                                                                                                                                                                                                                                                                                             |
|---------------------------------|-------------------------------------------------------------------------------------------------------------------------------------------------------------------------------------------------------------------------------------------------------------------------------------------------------------------------------------------------------------------------------------------------------------------------------------------------------------------------------------------------------------------------------------------------------------|
| Journal:                        | <i>BMJ Open</i>                                                                                                                                                                                                                                                                                                                                                                                                                                                                                                                                             |
| Manuscript ID:                  | bmjopen-2012-002327                                                                                                                                                                                                                                                                                                                                                                                                                                                                                                                                         |
| Article Type:                   | Research                                                                                                                                                                                                                                                                                                                                                                                                                                                                                                                                                    |
| Date Submitted by the Author:   | 09-Nov-2012                                                                                                                                                                                                                                                                                                                                                                                                                                                                                                                                                 |
| Complete List of Authors:       | Griswold, Sharon; Drexel University College of Medicine, Emergency Medicine<br>Bonaroti, Alisha; Drexel University College of Medicine, Emergency Medicine<br>Rieder, Christopher; Hahnemann University Hospital, Safety and Security<br>Erbayri, John; Drexel University College of Medicine, Emergency Medicine<br>Parsons, Jessica; Drexel University College of Medicine, Emergency Medicine<br>Nocera, Romy; Drexel University College of Medicine, Emergency Medicine<br>Hamilton, Richard; Drexel University College of Medicine, Emergency Medicine |
| <b>Primary Subject Heading</b>: | Occupational and environmental medicine                                                                                                                                                                                                                                                                                                                                                                                                                                                                                                                     |
| Secondary Subject Heading:      | Medical education and training, Occupational and environmental medicine, Public health                                                                                                                                                                                                                                                                                                                                                                                                                                                                      |
| Keywords:                       | ACCIDENT & EMERGENCY MEDICINE, Health & safety < HEALTH SERVICES ADMINISTRATION & MANAGEMENT, Risk management < HEALTH SERVICES ADMINISTRATION & MANAGEMENT, MEDICAL EDUCATION & TRAINING, Public health < INFECTIOUS DISEASES                                                                                                                                                                                                                                                                                                                              |
|                                 |                                                                                                                                                                                                                                                                                                                                                                                                                                                                                                                                                             |

SCHOLARONE™  
Manuscripts

1  
2  
3 **Investigation of a safety-engineered device to prevent needlestick injury:**  
4

5 **Why hasn't StatLock stuck?**  
6  
7

8  
9  
10 **Sharon Griswold<sup>1</sup>, Alisha Bonaroti<sup>1</sup>, Christopher J. Rieder<sup>2</sup>, John Erbayri<sup>1</sup>, Jessica**  
11 **Parsons<sup>1</sup>, Romy Nocera<sup>1</sup>, Richard Hamilton<sup>1</sup>**  
12  
13

14  
15  
16 <sup>1</sup>**Department of Emergency Medicine, Drexel University College of Medicine, Philadelphia,**  
17 **PA**  
18

19  
20 <sup>2</sup>**Department of Security and Safety, Senior Industrial Hygienist, Hahnemann University**  
21 **Hospital, Philadelphia, PA**  
22

23  
24  
25 **Corresponding Author:**  
26

27 Sharon Griswold, MD, MPH  
28 Simulation Center Director  
29 Drexel University College of Medicine  
30 Department of Emergency Medicine, NCB  
31 Room 2108, 2nd floor, MS 1011  
32 245 North 15th Street  
33 Philadelphia, PA 19102  
34 phone 215-762-2368  
35 fax 215-762-1307  
36 email [sgriswol@drexelmed.edu](mailto:sgriswol@drexelmed.edu)  
37  
38  
39  
40  
41  
42  
43  
44  
45  
46  
47  
48  
49  
50  
51  
52  
53  
54  
55  
56  
57  
58  
59  
60

## Article Summary

### Article Focus

This article sought to define whether an alternative safety engineered device (SED) could help prevent needlestick injury (NSI) in healthcare workers (HCWs) who place central venous catheters (CVC). To begin to answer these questions the study involved three phases:

1. A retrospective analysis of de-identified occupational health records from our tertiary care urban United States (US) hospital to clearly identify how many HCW had NSI while placing CVC.
2. Ninety-five residents who frequently place CVC during training were surveyed regarding their knowledge and experience with NSIs and SEDs.
3. A random sample of six residents participated in a focus group session discussing barriers to use of the SED.

### Key Messages

- A readily available safety-engineered device does exist as an alternative to using three sharps to suture a CVC.
- Sixteen percent (21 of 131) of NSIs occurring in residents and fellows over a 4-year period (July 2007–July 2011) of a single institution occurred during securement of an invasive catheter.
- If safety and efficacy of the device can be proven, 5.25 healthcare worker NSIs per year could be avoided at our institution. This would translate into a direct cost savings of \$19,362 over the 4-year period.

### Strength and Limitations

- A notable strength of this work is that it addresses the International Healthcare Worker Safety Center March 2012<sup>1</sup> call to action to address a lack of new progress in NSI rates.

1  
2  
3 The study identifies a new area where significant progress may be made to reduce  
4 sharps injuries worldwide.  
5  
6

- 7  
8 • A significant limitation is that the study is currently limited to a single US tertiary care  
9 site.  
10  
11  
12  
13  
14  
15  
16  
17  
18  
19  
20  
21  
22  
23  
24  
25  
26  
27  
28  
29  
30  
31  
32  
33  
34  
35  
36  
37  
38  
39  
40  
41  
42  
43  
44  
45  
46  
47  
48  
49  
50  
51  
52  
53  
54  
55  
56  
57  
58  
59  
60

For peer review only

1  
2  
3 Keywords: needlestick injury; sharps injury; safety-engineered device; healthcare worker injury;  
4  
5 central venous catheter  
6  
7  
8  
9

## 10 11 12 **ABSTRACT**

13  
14  
15  
16 Objective: This article sought to define whether an alternative safety engineered device (SED)  
17  
18 could help prevent needlestick injury (NSI) in healthcare workers (HCWs) who place central  
19  
20 venous catheters (CVC).  
21

22  
23 Design: The study involved three phases: 1) A retrospective analysis of de-identified  
24  
25 occupational health records from our tertiary care urban US hospital to clearly identify NSI risk  
26  
27 and rates to HCW during invasive catheter placement; 2) Ninety-five residents were surveyed  
28  
29 regarding their knowledge and experience with NSIs and SEDs. 3) A random sample of six  
30  
31 residents participated in a focus group session discussing barriers to use of the SED.  
32

33  
34 Setting: A single urban US tertiary care teaching hospital.  
35

36  
37 Participants: A retrospective analysis of NSI to HCW in a tertiary care urban US hospital was  
38  
39 conducted over a 4-year period (July 2007–July 2011). Ninety-five residents from specialties  
40  
41 that often place CVC during training (surgery, surgical subspecialties, internal medicine,  
42  
43 anesthesia and emergency medicine) were surveyed regarding their experience with NSIs and  
44  
45 SEDs. A random sample of six residents participated in a focus group session discussing  
46  
47 barriers to use of the SED.  
48

49  
50 Results: 314 NSIs were identified via occupational health records. Sixteen percent (21 of 131) of  
51  
52 NSIs occurring in residents and fellows occurred during securement of an invasive catheter  
53  
54 such as a CVC. If an SED device had been used, these 5.25 NSIs/year could have been  
55  
56 avoided. Each NSI occurring in an HCW incurred an estimated average direct cost of \$922.  
57  
58 Thus, utilization of the SED could have saved \$19,362 over the 4-year period.  
59  
60

1  
2  
3 Conclusion: SEDs are currently available and can be used as an alternative to sharps. If safety  
4 and efficacy can be demonstrated, then implementation of such devices can significantly reduce  
5 the number of NSIs.  
6  
7  
8  
9

10  
11  
12  
13  
14 There is no additional data available  
15  
16  
17

## 18 INTRODUCTION

19  
20  
21  
22 Needlestick or sharps injuries (NSIs) among healthcare workers (HCWs) are a common and  
23 potentially avoidable injury. An estimated 600,000 to 800,000 percutaneous injuries occur  
24 annually among HCWs in the United States<sup>2</sup>. As high as these estimates appear, the literature  
25 indicates that sharps injuries are significantly underreported<sup>3-5</sup>. These injuries place HCWs at  
26 risk for blood-borne infections and result in considerable psychological distress. In addition, the  
27 healthcare system incurs substantial costs from the occupational health testing, prophylaxis,  
28 and follow-up that must be implemented for each reported NSI.  
29  
30  
31  
32

33  
34  
35  
36  
37 Safety-engineered devices (SEDs) are promising design innovations intended to prevent  
38 hazards and accidents. In medicine, numerous engineering controls have been introduced to  
39 decrease the incidence of NSIs among HCWs, including safety-winged steel needles, safety  
40 intravenous catheter insertion needles, and many others.  
41  
42  
43  
44  
45  
46  
47  
48

49  
50 The StatLock device (Bard Access Systems, Salt Lake City, UT) (Figure 1) is an SED designed  
51 to prevent NSIs during placement of central venous catheters (CVCs). The StatLock device has  
52 been available in all adult triple-lumen CVC kits in our urban tertiary care US institution since  
53 July 2009. Despite its availability, the StatLock is not widely used in clinical practice. The  
54  
55  
56  
57  
58  
59  
60

1  
2  
3 purpose of our study was to perform a needs analysis by retrospectively examining HCW data  
4 from our institution to determine whether implementation of the SED would significantly reduce  
5 NSIs. We sought to determine whether practitioners did incur NSIs during the securement  
6 phase of the CVC procedure, and if this could have been prevented with the use of this SED.  
7 We also sought to identify potential barriers to implementation of a new SED in the healthcare  
8 environment. The SED device was readily available in the safety triple lumen catheter kits within  
9 the institution yet not utilized within the institution.  
10  
11  
12  
13  
14  
15  
16  
17  
18  
19  
20

21 We hypothesized that a substantial number of NSIs occur during resident placement of CVCs,  
22 which might be prevented by use of the StatLock device. However, barriers including staff  
23 resistance and training time are likely to impede implementation of safety controls.  
24  
25  
26  
27  
28  
29  
30

## 31 **METHODS**

32  
33 Institutional review board approval was obtained and all NSI data were de-identified. The study  
34 was conducted at Hahnemann University Hospital (HUH), an urban tertiary care hospital in the  
35 United States. We analyzed retrospective data on all NSIs reported between July 2007 and July  
36 2011 by HCWs in the adult-care ACGME resident training programs (except neurosurgery).  
37  
38 Ninety-five residents from disciplines responsible for CVC placement at our institution were  
39 identified and enrolled in a prospective longitudinal study: surgery, emergency medicine,  
40 internal medicine, and anesthesia. All participants signed written consent to participate. A plan  
41 for compensation was incorporated into the study design to maximize return for 12-month  
42 follow-up. Demographic data for each of the residents were collected, including level of training,  
43 department, age, sex, race, and handedness. The survey questions were designed to determine  
44 residents' prior exposure to NSIs and to evaluate their prior knowledge of and experience with  
45  
46  
47  
48  
49  
50  
51  
52  
53  
54  
55  
56  
57  
58  
59  
60

1  
2  
3 the StatLock device. Each resident was randomly assigned to either a simulation curriculum or  
4  
5 to a standard curriculum educational program to familiarize them with the SED device  
6  
7 application, and all agreed to return in 12 months for a repeat questionnaire. The endpoint for  
8  
9 the longitudinal phase of the study was defined as a difference in NSIs between the groups.  
10  
11 This portion of the study is still in progress. Finally, a focus group of six randomly selected  
12  
13 residents was conducted to assess impressions of the device and potential barriers to its  
14  
15 implementation.  
16  
17

### 18 19 **Data analysis**

20  
21 De-identified data on all NSIs occurring at our institution were independently reviewed by three  
22  
23 study investigators (SG, AB, CR). All reported NSIs were reviewed and characterized according  
24  
25 to occupation of the HCW incurring the injury and according to circumstances regarding the  
26  
27 injury. Frequency counts of NSIs were tabulated (Figures 2 and 3). Frequency counts of  
28  
29 physician NSIs that occurred during a catheter placement such as a CVC, large bore single  
30  
31 lumen catheter, dialysis catheter, or arterial catheter line were also reviewed by the same three  
32  
33 investigators and compared for agreement in interpretation. Audio-recorded focus group text  
34  
35 was transcribed and data were extracted describing both positive and negative observations  
36  
37 regarding the StatLock device.  
38  
39  
40  
41  
42  
43  
44

## 45 **RESULTS**

### 46 47 **Retrospective institutional data analysis**

48  
49 Analysis of the retrospective NSI data revealed that physicians (residents, fellows, and  
50  
51 attendings) accounted for 43% (136 of 314) of the total NSIs occurring between July 2007 and  
52  
53 July 2011 (Figure 2). Resident NSIs accounted for 87% (118 of 13) of the total physician NSIs  
54  
55 (118 residents, 13 fellows, and 5 attending physicians) occurring during this 4-year period.  
56  
57  
58  
59  
60



1  
2  
3 Thirty-one percent of the resident/fellow NSIs injuries (40 of 131) occurred during the placement  
4 of CVC or catheter lines that require securement to patient skin. Fifty-three percent (21 of 40) of  
5 the NSIs that occurred during these procedures occurred while the line was being secured to  
6 the patient's skin with a suture needle. This accounted for 16% (21 of 131) of the total number  
7 of resident/fellow NSIs over the 4-year period. It is possible that 13 additional NSIs occurred  
8 during securement of these catheter lines, but unless our occupational health record specifically  
9 documented that the NSI occurred while the worker was securing the line, those data were not  
10 included. An additional six NSIs occurred with the larger-bore needle while the worker was  
11 attempting to cannulate the vessel.  
12  
13  
14  
15  
16  
17  
18  
19  
20  
21  
22  
23  
24  
25

### 26 **Cost analysis**

27  
28 Given the numbers of NSIs determined from retrospective analysis, we calculated that use of a  
29 needleless device to secure the CVC could have prevented these 21 NSIs, each costing an  
30 estimated \$922 (average NSI cost incurred at this institution). Costs associated with an NSI  
31 include provider fees for initial and follow-up visits, blood draw and analysis costs, medication  
32 costs, and administrative costs. Costs vary from case to case depending on the treatment plan,  
33 medication costs, and length of follow-up. Eliminating all 21 NSIs that definitively occurred  
34 during securement of the line would have translated into a direct cost savings of \$19,362. If the  
35 possible additional 13 NSIs also occurred during the securement phase where three sharps are  
36 included in the calculation (hollow-bore needle for repeat anesthesia, suture needle, and  
37 scalpel), this would translate to a direct cost savings of \$31,348 over the 4-year period. These  
38 cost estimates do not include the indirect cost of time lost from work and other indirect financial  
39 and social costs.  
40  
41  
42  
43  
44  
45  
46  
47  
48  
49  
50  
51  
52  
53  
54  
55  
56

### 57 **Enrollment survey of residents enrolled into the longitudinal study**

1  
2  
3 The prospective portion of the study surveyed 95 residents. Only 30% had previous knowledge  
4 of the needleless SED that is supplied in all CVC safety kits at our institution. Only 19% had  
5 ever had training regarding the use of any SED or used the device in clinical practice. Twenty-  
6 five percent of responding residents (24 of 95) answered yes when asked the question, "Have  
7 you ever had a needlestick injury associated with patient body fluid exposure?" In a follow-up  
8 question, we asked, "Did you report the incident each time?" Twenty-one percent (5 of 24)  
9 responded that they did not always report NSI. This finding is consistent with prior data  
10 suggesting that HCW NSIs are underreported<sup>3-6</sup>. Forty-nine percent of residents surveyed  
11 stated that they had had at least one near miss/ close call needlestick incident in the past 2  
12 months (Figure 4).  
13  
14  
15  
16  
17  
18  
19  
20  
21  
22  
23  
24  
25  
26  
27

### 28 **Focus group data**

29  
30 Focus group discussions were conducted with six randomly selected study participants.  
31  
32 Participants were interviewed by a study investigator (SG) individually and each session was  
33 audio recorded with the permission of the participant. Focus group sessions lasted an average  
34 of 30 minutes to discuss participant use of the StatLock device, their impressions of the SED,  
35 and additional thoughts they had on the use of StatLock over traditional sutures when securing  
36 central lines. Audio data were extracted and analyzed by two independent study investigators  
37 (SG and AB). Focus group data are presented in Table 1.  
38  
39  
40  
41  
42  
43  
44  
45  
46  
47  
48

49 Responses varied across participants. One surgery resident noted that surgeons especially are  
50 more familiar with suturing than with applying StatLock and may be able to secure a CVC faster  
51 using sutures. The resident stated, "Time is of the essence. [I] don't want to wait for StatLock to  
52 dry when sutures are faster, more efficient, more comfortable." Another resident who is also  
53  
54  
55  
56  
57  
58  
59  
60

1  
2  
3 comfortable and adept at suturing lines mentioned that she would want more practice with  
4  
5 applying the StatLock device before using it in a clinical setting.  
6  
7

8  
9  
10 One emergency medicine resident described himself as “motivated to use StatLock after  
11  
12 witnessing multiple coworkers experience fingersticks.” After using the StatLock device just one  
13  
14 time, he found the placement of the StatLock device was quicker than suturing the CVC.  
15  
16

17  
18  
19 Two of the six residents reported that they valued the StatLock device in certain situations when  
20  
21 they were more likely to incur an NSI, such as when the patient is unpredictable or unwilling to  
22  
23 lie still. One resident reported that in such cases it is “beneficial to use as few sharps as  
24  
25 possible.”  
26  
27

28  
29  
30 Half of the residents were hesitant to use StatLock in certain circumstances because they  
31  
32 thought that the nurses and other practitioners lacked knowledge about the device. After  
33  
34 securing a CVC using StatLock in the emergency department, one resident reported, “The  
35  
36 admitting team was confused, did not know what the device was, and [was] concerned over  
37  
38 whether StatLock would stay in place.”  
39  
40  
41  
42  
43  
44

45  
46 One resident pointed out that the StatLock device may be beneficial in certain populations of  
47  
48 patients. “[StatLock would be] beneficial cosmetically when placing an upper neck line next to  
49  
50 the face, especially for patients who form keloids.”  
51  
52

53  
54  
55 Audio-recorded focus group text was transcribed and data were extracted and categorized as  
56  
57 neutral, positive or negative observations regarding the StatLock device.  
58  
59  
60

## DISCUSSION

In 2009 we developed a partnership with our institutional industrial hygienist to investigate opportunities to reduce NSIs among resident physicians in our institution. In the fiscal year between 2008 and 2009, nurse NSIs increased 10% and physician NSIs increased 70% at our institution. In 2009 at HUH, 46% of the total reported NSIs involved residents. A 2007 study of 699 surgical residents at 17 US medical centers found that by the 5<sup>th</sup> year of residency, 99% had had at least one NSI. Moreover, for 53% of respondents, the NSI had involved a high-risk patient with a history of HIV infection, hepatitis B or C virus infection, or injection drug use.<sup>2</sup> In 2009, our US-based urban hospital reported 27.6 injuries per 100 occupied beds, which is above the EPINet average of 20.1 for teaching hospitals<sup>7</sup>. These data were alarming and required immediate analysis for the potential for intervention.

In medicine, engineering controls that have been introduced to decrease the incidence of NSIs among HCWs include safety-winged steel needles, safety intravenous catheter insertion needles, polyester film-coated capillary tubes, safety-shielded phlebotomy needles, needleless blood transfer devices, safety peripherally inserted central catheter stylets, blood gas needle-holding devices, blunt-tip needles, and shielded hypodermic needles/syringes<sup>8</sup>. Current literature indicates that 29% to 35% of reported occupational NSIs could have been prevented if an SED had been used<sup>9</sup>. Although engineering controls may require capital investment, the cost savings resulting from improved safety may justify the expense. However, devices that depend on user activation generate benefit only when correctly used; thus HCWs must be educated in their use.

1  
2  
3 The StatLock SED secures CVCs using a locking device attached to the skin using benzoin  
4 adhesive instead of the traditional method of using sharps. Traditionally, after a CVC is placed  
5 the patient may require additional local anesthesia in a site separate from the insertion site,  
6 necessitating the use of a hollow-bore needle. A CVC is secured with the use of a straight  
7 suture needle and the suture is cut with a scalpel. Therefore, using the SED minimizes the risk  
8 of NSI during securement of CVC by eliminating three steps in which sharps are used. Despite  
9 the easy availability of the StatLock device, few resident physicians are aware of it and fewer  
10 still have used it in clinical practice. Only 30% in our study had previous knowledge of the  
11 needleless SED that is supplied in all CVC safety kits at our institution. Only 19% had ever used  
12 the device in clinical practice.  
13  
14  
15  
16  
17  
18  
19  
20  
21  
22  
23  
24  
25  
26  
27

28 Despite increased awareness of sharps injuries and some attempts at prevention, NSIs  
29 continue to be a serious problem. Our study supported earlier research findings that among  
30 HCWs, physicians have the highest risk of NSI<sup>2, 10</sup>, and among physicians, residents have a  
31 three times greater risk of blood and body fluids exposure than senior doctors<sup>11</sup>.  
32  
33  
34  
35  
36  
37  
38

39 In our institution, physicians have been reluctant to use the StatLock device because they have  
40 questions about efficacy and patient safety. Some express concern that the device might not  
41 work as well as the traditional method of securing a CVC to patients' skin using sutures. Many  
42 reports in the literature have been authored by individuals associated with the manufacturers,  
43 raising the question of potential bias. The StatLock device is currently available in every triple-  
44 lumen CVC kit in our institution. Therefore, the issue of use of the device does not rest on its  
45 availability, but rather on physician awareness, training, and preference.  
46  
47  
48  
49  
50  
51  
52  
53  
54  
55  
56  
57  
58  
59  
60

1  
2  
3 Focus group discussions revealed that such factors have indeed presented barriers to  
4  
5 implementation of the StatLock device. Residents expressed concern regarding time constraints  
6  
7 and familiarity with device. Previous literature has documented similar barriers to  
8  
9 implementation. Cost, personnel time, and resistance to change are several of the most  
10  
11 commonly documented deterrents.<sup>6, 12-16</sup> Surgeons and anesthesiologists have been  
12  
13 recognized as the cohorts least likely to use safety devices designed to prevent NSIs,  
14  
15 presumably because they are skilled at suturing.<sup>17</sup> Reluctance may also stem from feelings of  
16  
17 discomfort and questions of efficacy.<sup>17</sup> Evidence-based reasoning is often absent from the  
18  
19 foundation of implementation programs, exacerbating opposition to change.<sup>18</sup> Perpetual access  
20  
21 to conventional sharps also hinders implementation of safety devices.<sup>19</sup>  
22  
23  
24  
25  
26

27 Some institutions have recognized that simple logistics can prevent staff from using safety-  
28  
29 engineered devices. Contractual purchasing agreements can render devices unavailable and  
30  
31 certain devices may not be compatible with existing equipment<sup>6, 16</sup>. The overabundance of SEDs  
32  
33 on the market makes it difficult for institutions to choose<sup>15</sup>, yet most devices are not applicable  
34  
35 for all situations and technology must become more advanced to meet the remaining  
36  
37 demand.<sup>15,18</sup>  
38  
39  
40  
41

42 Lastly, HCWs are characterized as being desensitized to disease and consequently possessing  
43  
44 a false sense of security regarding the effects of NSIs.<sup>17</sup> When this complacency is coupled  
45  
46 with a lack of multidisciplinary support, both “horizontally and vertically,” implementation of  
47  
48 safety devices becomes extremely difficult.<sup>20</sup>  
49  
50  
51  
52  
53  
54

## 55 CONCLUSIONS

56  
57  
58  
59  
60

1  
2  
3 The common incidence of needlestick injuries among healthcare workers clearly indicates a  
4 need for further intervention. Engineering controls such as needleless securement devices are  
5 currently available and can be used as an alternative to sharps. Retrospective analysis of  
6 institutional records demonstrated that over a 4-year period (July 2007–July 2011), 16% of  
7 resident/fellow NSIs (21 of 131) could have been avoided with the use of a safety-engineered  
8 device such as the Statlock device to secure a CVC. If safety and efficacy of the device can be  
9 demonstrated, then implementation of such devices may significantly reduce the number of  
10 needlestick injuries among physicians. However, education alone will not be sufficient to  
11 overcome barriers to implementation.  
12  
13  
14  
15  
16  
17  
18  
19  
20  
21  
22  
23  
24  
25  
26

### 27 **Funding**

28  
29 This study was supported by Drexel College of Medicine IBC Simulation Grant Funding. The  
30 funding source had no involvement in the study design; collection, analysis or interpretation  
31 data; writing of the report; nor the decision to submit the paper for publication.  
32  
33  
34  
35  
36  
37

### 38 **Contributorship**

39  
40 Dr Griswold-Theodorson had access to and takes responsibility for the integrity of the data and the  
41 accuracy of the data analysis. Dr Griswold-Theodorson: contributed to study conception and design,  
42 data collection, analysis and interpretation of the data, drafting of the manuscript, and critical revision  
43 of the article for important intellectual content.  
44  
45  
46  
47  
48

49 Ms Bonaroti: contributed to study design, data collection, data analysis and interpretation, reviewing  
50 and editing of the manuscript, and critical revision of the article for important intellectual content.  
51  
52

53 Mr Rieder: contributed to study design, data collection and analysis, review and editing of the  
54 manuscript.  
55  
56  
57  
58  
59  
60

1  
2  
3 Mr Erbayri: contributed to study design, data collection and analysis, review and editing of the  
4 manuscript.  
5  
6

7  
8 Dr Parsons: contributed to study design, data collection, data analysis and interpretation, reviewing,  
9 editing, and section writing of the manuscript.  
10  
11

12 Dr Nocera: contributed to study design, data collection and data interpretation, reviewing, editing,  
13 section writing of the manuscript and critical revision of the article for important intellectual content.  
14  
15

16 Dr Hamilton: contributed to interpretation of the data, reviewing, and editing of the manuscript and  
17 critical revision of the article for important intellectual content.  
18  
19

20  
21  
22 defamatory  
23

#### 24 25 **Data Sharing** 26

27  
28 There is no additional unpublished data.  
29  
30

#### 31 32 **Competing Interests** 33

34  
35 None  
36  
37  
38  
39  
40  
41  
42  
43  
44  
45  
46  
47  
48  
49  
50  
51  
52  
53  
54  
55  
56  
57  
58  
59  
60



1  
2  
3 Figure 1. Right infraclavicular subclavian triple-lumen catheter secured with StatLock needleless  
4 device (Bard Access Systems, Salt Lake City, UT). The StatLock needleless device replaces  
5 the need for suturing with a locking device secured with benzoin and tape.  
6  
7  
8  
9

10 Figure 2. NSI injury at Hahnemann Hospital by occupation from four year period: July 1, 2007 to  
11 June 30, 2011. MD includes residents, attendings, and fellows. Nurse: includes nurses, nurse  
12 anesthesia, and nurse practitioners. Others include respiratory therapy, environmental services,  
13 laboratory personnel and others not categorized above.  
14  
15  
16  
17  
18

19 Figure 3. Needlestick injuries while inserting CVC or other invasive catheter requiring sutures at  
20 Hahnemann University Hospital for the 4-year period July 1, 2007 to June 30, 2011.  
21  
22  
23

24 Figure 4. Close calls involving needlestick injuries witnessed in the 2 months preceding survey  
25 administration in July 2011.  
26  
27  
28

29 Table 1 Data extracted from six randomly selected focus group participants  
30  
31  
32  
33  
34  
35  
36  
37  
38  
39  
40  
41  
42  
43  
44  
45  
46  
47  
48  
49  
50  
51  
52  
53  
54  
55  
56  
57  
58  
59  
60

## References

1. Consensus Statement and Call to Action on Sharps Safety released March 2012: International Healthcare Worker Safety Center, 2012.  
<http://www.healthsystem.virginia.edu/pub/epinet/home.html>. Retrieved November 1, 2012.
2. Makary MA, Al-Attar A, Holzmüller CG, et al. Needlestick injuries among surgeons in training. *New England Journal of Medicine* 2007;356(26):2693-9.
3. Elliott SKF, Keeton A, Holt A. Medical students' knowledge of sharps injuries. *Journal of Hospital Infection* 2005;60(4):374-77.
4. Yamamoto AJ, Solomon JA, Soulen MC, et al. Sutureless Securement Device Reduces Complications of Peripherally Inserted Central Venous Catheters. *Journal of Vascular and Interventional Radiology* 2002;13(1):77-81.
5. Trim JC, Elliott TSJ. A review of sharps injuries and preventative strategies. *Journal of Hospital Infection* 2003;53(4):237-42.
6. (OSHA) OSHA. Record Summary of the Request for Information on Occupational Exposure to Bloodborne Pathogens. In: Labor USDo, editor, 1999.
7. EPINet. <http://healthsystem.virginia.edu/internet/epinet/EPINet-2007-rates.pdf>, 2007. Retrieved October 10, 2012.
8. Dement JM, Epling C, Østbye T, et al. Blood and body fluid exposure risks among health care workers: Results from the Duke Health and Safety Surveillance System. *American Journal of Industrial Medicine* 2004;46(6):637-48.
9. Elder A, Paterson C. Sharps injuries in UK health care: a review of injury rates, viral transmission and potential efficacy of safety devices. *Occupational Medicine* 2006;56(8):566-74.

- 1  
2  
3  
4  
5  
6  
7  
8  
9  
10  
11  
12  
13  
14  
15  
16  
17  
18  
19  
20  
21  
22  
23  
24  
25  
26  
27  
28  
29  
30  
31  
32  
33  
34  
35  
36  
37  
38  
39  
40  
41  
42  
43  
44  
45  
46  
47  
48  
49  
50  
51  
52  
53  
54  
55  
56  
57  
58  
59  
60
10. Wicker S, Jung J, Allwinn R, et al. Prevalence and prevention of needlestick injuries among health care workers in a German university hospital. *International Archives of Occupational and Environmental Health* 2008;81(3):347-54.
  11. Naghavi SHR, Sanati KA. Accidental blood and body fluid exposure among doctors. *Occupational Medicine* 2009;59(2):101-06.
  12. Sharps Injuries Among Medical Trainees. In: Occupational Health Surveillance Program MDoPH, editor. Boston, 2011.  
[http://www.mass.gov/Eeohhs2/docs/dph/occupational\\_health/injuries\\_medical\\_trainees\\_02\\_09.pdf](http://www.mass.gov/Eeohhs2/docs/dph/occupational_health/injuries_medical_trainees_02_09.pdf). Retrieved November 1, 2012.
  13. Jagger J, Perry J, Goma A, et al. The impact of U.S. policies to protect healthcare workers from bloodborne pathogens: The critical role of safety-engineered devices. *Journal of Infection and Public Health* 2008;1(2):62-71.
  14. Vason BJ. The safety needle switchover, part 1 of 2. *Nursing Management* 2002;33(5):33-6.
  15. Pegues DAMD. Building Better Programs to Prevent Transmission of Blood-Borne Pathogens to Healthcare Personnel: Progress in the Workplace, But Still No End in Sight •. *Infection Control and Hospital Epidemiology* 2003;24(10):719-21.
  16. Sohn SMPH, Eagan JRN, Sepkowitz KAMD, et al. Effect of Implementing Safety-Engineered Devices on Percutaneous Injury Epidemiology. *Infection Control and Hospital Epidemiology* 2004;25(7):536-42.
  17. Guglielmi CL, Spratt DG, Berguer R, et al. A Call to Arms to Prevent Sharps Injuries in Our ORs. *Association of Operating Room Nurses. AORN Journal* 2010;92(4):387-92.
  18. Hall J. Worker safety: A road well-traveled, yet so far to go. *Healthcare Purchasing News* 2003;27(8):46-46.

1  
2  
3 19. AORN. Seeking solutions to increase sharps safety. *Association of Operating Room Nurses Journal*  
4  
5 2011;94(6):C1-C1,C8,C9.  
6

7  
8 20. Hagstrom AM. Perceived Barriers to Implementation of a Successful Sharps Safety Program.  
9  
10 *Association of Operating Room Nurses. AORN Journal* 2006;83(2):391-7.  
11  
12

13  
14  
15  
16  
17  
18  
19  
20  
21  
22  
23  
24  
25  
26  
27  
28  
29  
30  
31  
32  
33  
34  
35  
36  
37  
38  
39  
40  
41  
42  
43  
44  
45  
46  
47  
48  
49  
50  
51  
52  
53  
54  
55  
56  
57  
58  
59  
60

For peer review only



1  
2  
3  
4  
5  
6  
7  
8  
9  
10  
11  
12  
13  
14  
15  
16  
17  
18  
19  
20  
21  
22  
23  
24  
25  
26  
27  
28  
29  
30  
31  
32  
33  
34  
35  
36  
37  
38  
39  
40  
41  
42  
43  
44  
45  
46  
47  
48  
49  
50  
51  
52  
53  
54  
55  
56  
57  
58  
59  
60

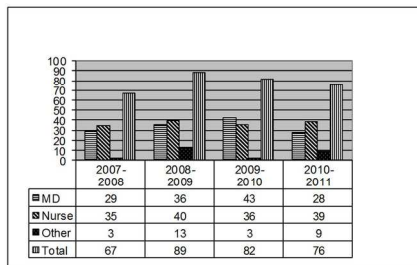

Figure 2. NSI injury at Hahnemann Hospital by occupation from four year period: July 1, 2007 to June 30, 2011. MD includes residents, attendings, and fellows. Nurse: includes nurses, nurse anesthesia, and nurse practitioners. Others include respiratory therapy, environmental services, laboratory personnel and others

279x215mm (300 x 300 DPI)

Review only

1  
2  
3  
4  
5  
6  
7  
8  
9  
10  
11  
12  
13  
14  
15  
16  
17  
18  
19  
20  
21  
22  
23  
24  
25  
26  
27  
28  
29  
30  
31  
32  
33  
34  
35  
36  
37  
38  
39  
40  
41  
42  
43  
44  
45  
46  
47  
48  
49  
50  
51  
52  
53  
54  
55  
56  
57  
58  
59  
60

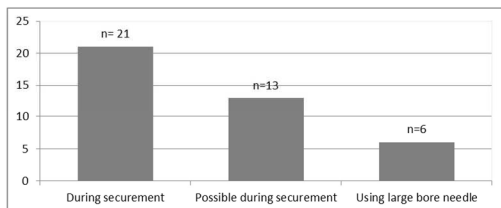

Figure 3. NSI injury while inserting CVC or other invasive catheter requiring sutures from four year period: July 1, 2007 to June 30, 2011. During securement was identified as a NSI during catheter securement; Possible during securement was not identified in the occupational health record whether with large bore needle or during securement with sharps. Using

279x215mm (300 x 300 DPI)

ew only

1  
2  
3  
4  
5  
6  
7  
8  
9  
10  
11  
12  
13  
14  
15  
16  
17  
18  
19  
20  
21  
22  
23  
24  
25  
26  
27  
28  
29  
30  
31  
32  
33  
34  
35  
36  
37  
38  
39  
40  
41  
42  
43  
44  
45  
46  
47  
48  
49  
50  
51  
52  
53  
54  
55  
56  
57  
58  
59  
60

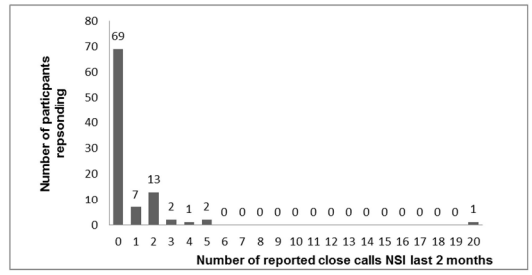

Figure 4. Close calls involving needlestick injuries witnessed in the 2 months preceding survey administration in July 2011.

.....  
  
.....  
  
.....

279x215mm (300 x 300 DPI)

ew only



Table 1 Data extracted from six randomly selected focus group participants

| Neutral comments                                                                                      | Positive comments                                                                                                                                                                                                                           | Negative comments                                                                                                               |
|-------------------------------------------------------------------------------------------------------|---------------------------------------------------------------------------------------------------------------------------------------------------------------------------------------------------------------------------------------------|---------------------------------------------------------------------------------------------------------------------------------|
| [I] would want more practice with applying the StatLock device before using it in a clinical setting. | “[I] am motivated to use StatLock after witnessing multiple coworkers experience fingersticks.”                                                                                                                                             | “Time is of the essence. [I] don’t want to wait for StatLock to dry when sutures are faster, more efficient, more comfortable.” |
|                                                                                                       | After using the StatLock device just one time, one resident found that the placement of the StatLock device was quicker than suturing the CVC.                                                                                              | Some residents were hesitant to use the device because the nurses and other practitioners lacked knowledge of the device.       |
|                                                                                                       | Two of the 6 residents reported that they valued the StatLock device in certain situations when they were more likely to incur an NSI. One stated this was particularly useful when the patient is unpredictable or unwilling to lie still. | “The admitting team was confused, did not know what device was, and [was] concerned over whether StatLock would stay in place.” |
|                                                                                                       | One stated that the device                                                                                                                                                                                                                  | Resistance to StatLock due to                                                                                                   |

1  
2  
3  
4  
5  
6  
7  
8  
9  
10  
11  
12  
13  
14  
15  
16  
17  
18  
19  
20  
21  
22  
23  
24  
25  
26  
27  
28  
29  
30  
31  
32  
33  
34  
35  
36  
37  
38  
39  
40  
41  
42  
43  
44  
45  
46  
47  
48  
49  
50  
51  
52  
53  
54  
55  
56  
57  
58  
59  
60

|  |                                                         |                                                                |
|--|---------------------------------------------------------|----------------------------------------------------------------|
|  | may be useful especially for patients who form keloids. | familiarity with suturing, especially among surgical residents |
|--|---------------------------------------------------------|----------------------------------------------------------------|

For peer review only



**Investigation of a safety-engineered device to prevent  
needlestick injury:  
Why hasn't StatLock stuck?**

|                                 |                                                                                                                                                                                                                                                                                                                                                                                                                                                                                                                                                             |
|---------------------------------|-------------------------------------------------------------------------------------------------------------------------------------------------------------------------------------------------------------------------------------------------------------------------------------------------------------------------------------------------------------------------------------------------------------------------------------------------------------------------------------------------------------------------------------------------------------|
| Journal:                        | <i>BMJ Open</i>                                                                                                                                                                                                                                                                                                                                                                                                                                                                                                                                             |
| Manuscript ID:                  | bmjopen-2012-002327.R1                                                                                                                                                                                                                                                                                                                                                                                                                                                                                                                                      |
| Article Type:                   | Research                                                                                                                                                                                                                                                                                                                                                                                                                                                                                                                                                    |
| Date Submitted by the Author:   | 12-Mar-2013                                                                                                                                                                                                                                                                                                                                                                                                                                                                                                                                                 |
| Complete List of Authors:       | Griswold, Sharon; Drexel University College of Medicine, Emergency Medicine<br>Bonaroti, Alisha; Drexel University College of Medicine, Emergency Medicine<br>Rieder, Christopher; Hahnemann University Hospital, Safety and Security<br>Erbayri, John; Drexel University College of Medicine, Emergency Medicine<br>Parsons, Jessica; Drexel University College of Medicine, Emergency Medicine<br>Nocera, Romy; Drexel University College of Medicine, Emergency Medicine<br>Hamilton, Richard; Drexel University College of Medicine, Emergency Medicine |
| <b>Primary Subject Heading</b>: | Occupational and environmental medicine                                                                                                                                                                                                                                                                                                                                                                                                                                                                                                                     |
| Secondary Subject Heading:      | Medical education and training, Occupational and environmental medicine, Public health                                                                                                                                                                                                                                                                                                                                                                                                                                                                      |
| Keywords:                       | ACCIDENT & EMERGENCY MEDICINE, Health & safety < HEALTH SERVICES ADMINISTRATION & MANAGEMENT, Risk management < HEALTH SERVICES ADMINISTRATION & MANAGEMENT, MEDICAL EDUCATION & TRAINING, Public health < INFECTIOUS DISEASES                                                                                                                                                                                                                                                                                                                              |
|                                 |                                                                                                                                                                                                                                                                                                                                                                                                                                                                                                                                                             |

SCHOLARONE™  
Manuscripts

1  
2  
3 **Investigation of a safety-engineered device to prevent needlestick injury:**  
4

5 **Why hasn't StatLock stuck?**  
6  
7

8  
9  
10 **Sharon Griswold<sup>1</sup>, Alisha Bonaroti<sup>1</sup>, Christopher J. Rieder<sup>2</sup>, John Erbayri<sup>1</sup>, Jessica**  
11 **Parsons<sup>1</sup>, Romy Nocera<sup>1</sup>, Richard Hamilton<sup>1</sup>**  
12  
13

14  
15  
16 <sup>1</sup>**Department of Emergency Medicine, Drexel University College of Medicine, Philadelphia,**  
17 **PA**  
18

19  
20 <sup>2</sup>**Department of Security and Safety, Senior Industrial Hygienist, Hahnemann University**  
21 **Hospital, Philadelphia, PA**  
22

23  
24  
25 **Corresponding Author:**  
26

27 Sharon Griswold, MD, MPH  
28 Simulation Center Director  
29 Drexel University College of Medicine  
30 Department of Emergency Medicine, NCB  
31 Room 2108, 2nd floor, MS 1011  
32 245 North 15th Street  
33 Philadelphia, PA 19102  
34 phone 215-762-2368  
35 fax 215-762-1307  
36 email [sgriswol@drexelmed.edu](mailto:sgriswol@drexelmed.edu)  
37  
38  
39  
40  
41  
42  
43  
44  
45  
46  
47  
48  
49  
50  
51  
52  
53  
54  
55  
56  
57  
58  
59  
60

## Article Summary

### Article Focus

This article sought to determine whether an alternative safety engineered device (SED) could potentially prevent needlestick injury (NSI) in healthcare workers (HCWs) who place central venous catheters (CVC). It also aims to identify potential reasons why an available SED is not utilized by HCW. To begin to answer these questions the study involved three phases:

1. A retrospective analysis of de-identified occupational health records from our tertiary care urban United States (US) hospital to clearly identify how many HCW had NSI while placing CVC.
2. Ninety-five residents who frequently place CVC during training were surveyed regarding their knowledge and experience with NSIs and SEDs.
3. A random sample of six residents participated in a focus group session discussing barriers to use of the SED.

### Key Messages

- Sixteen percent (21 of 131) of NSIs occurring in residents and fellows over a 4-year period (July 2007–June 2011) in a single institution occurred during securement of an invasive catheter despite a readily available safety-engineered device that would eliminate the need for sharps during this part of invasive catheter insertion.
- If safety and efficacy of the device can be proven, 5.25 healthcare worker NSIs per year could be avoided at our institution. This would translate into a savings of at least \$57,183 in charges associated with NSIs over the 4-year period.
- Introduction of SED in an hospital should be accompanied by education, detailed information, and training of healthcare workers to encourage utilization of the device.

## Strengths and Limitations

- A notable strength of this work is that it addresses the International Healthcare Worker Safety Center March 2012<sup>1</sup> call to action to address a lack of new progress in NSI rates. The study identifies a new area where significant progress may be made to reduce sharps injuries worldwide.
- A significant limitation is that the study is currently limited to a single US tertiary care site.

Keywords: needlestick injury; sharps injury; safety-engineered device; healthcare worker injury; central venous catheter

## ABSTRACT

**Objective:** This article sought to define whether an alternative safety engineered device (SED) could help prevent needlestick injury (NSI) in healthcare workers (HCWs) who place central venous catheters (CVC).

**Design:** The study involved three phases: 1) A retrospective analysis of de-identified occupational health records from our tertiary care urban US hospital to clearly identify NSI risk and rates to HCW during invasive catheter placement; 2) Ninety-five residents were surveyed regarding their knowledge and experience with NSIs and SEDs. 3) A random sample of six residents participated in a focus group session discussing barriers to use of the SED.

**Setting:** A single urban US tertiary care teaching hospital.

**Participants:** A retrospective analysis of NSI to HCW in a tertiary care urban US hospital was conducted over a 4-year period (July 2007–June 2011). Ninety-five residents from specialties that often place CVC during training (surgery, surgical subspecialties, internal medicine,

1  
2  
3 anesthesia and emergency medicine) were surveyed regarding their experience with NSIs and  
4  
5 SEDs. A random sample of six residents participated in a focus group session discussing  
6  
7 barriers to use of the SED.  
8

9  
10 Results: 314 NSIs were identified via occupational health records. Sixteen percent (21 of 131) of  
11  
12 NSIs occurring in residents and fellows occurred during securement of an invasive catheter  
13  
14 such as a CVC. If an SED device had been used, these 5.25 NSIs/year could have been  
15  
16 avoided. Each NSI occurring in an HCW incurred at least \$2,723 in charges. Thus, utilization of  
17  
18 the SED could have saved a minimum of \$57,183 over the 4-year period.  
19

20  
21 Conclusion: SEDs are currently available and can be used as an alternative to sharps. If safety  
22  
23 and efficacy can be demonstrated, then implementation of such devices can significantly reduce  
24  
25 the number of NSIs.  
26

27  
28  
29 There is no additional data available  
30  
31

## 32 33 INTRODUCTION

34  
35  
36 Needlestick or sharps injuries (NSIs) among healthcare workers (HCWs) are a common and  
37  
38 potentially avoidable injury. An estimated 600,000 to 800,000 percutaneous injuries occur  
39  
40 annually among HCWs in the United States<sup>2</sup>. As high as these estimates appear, the literature  
41  
42 indicates that sharps injuries are significantly underreported<sup>3-5</sup>. These injuries place HCWs at  
43  
44 risk for blood-borne infections and result in considerable psychological distress. In addition, the  
45  
46 healthcare system incurs substantial costs from the occupational health testing, prophylaxis,  
47  
48 and follow-up that must be implemented for each reported NSI.  
49  
50

51  
52  
53  
54 Safety-engineered devices (SEDs) are promising design innovations intended to prevent  
55  
56 hazards and accidents. In medicine, numerous engineering controls have been introduced to  
57  
58  
59  
60

1  
2  
3 decrease the incidence of NSIs among HCWs, including safety-winged steel needles, safety  
4 intravenous catheter insertion needles, and many others.  
5  
6  
7  
8  
9

10  
11 The StatLock device (Bard Access Systems, Salt Lake City, UT) (Figure 1) is an SED designed  
12 to prevent NSIs during placement of central venous catheters (CVCs). It is a locking device that  
13 secures CVCs to the skin with benzoin adhesive instead of the traditional method of using  
14 sutures to secure CVCs to skin. Traditionally, after a CVC is placed the patient may require  
15 additional local anesthesia in a site separate from the insertion site, necessitating the use of a  
16 hollow-bore needle for lidocaine injection. Then, a straight suture needle is used to suture the  
17 CVC to the patient's skin. After making a knot with the suture, the ends are then cut with a  
18 scalpel. Therefore, using the SED minimizes the risk of NSI during securement of CVC by  
19 eliminating three steps during which sharps are used. Despite the easy availability of the  
20 StatLock device, few resident physicians are aware of it and fewer still have used it in clinical  
21 practice.  
22  
23  
24  
25  
26  
27  
28  
29  
30  
31  
32  
33  
34  
35  
36  
37

38 This SED has been available in all adult triple-lumen CVC kits in our urban tertiary care US  
39 institution since July 2009. Despite its availability, the SED is not widely used in clinical practice.  
40 The purpose of our study was to perform a needs analysis by retrospectively examining HCW  
41 data from our institution to determine whether implementation of the SED would significantly  
42 reduce NSIs. We sought to determine whether practitioners did incur NSIs during the  
43 securement phase of the CVC procedure, and if this could have been prevented with the use of  
44 this SED. Since this SED device has already been readily available in the safety triple lumen  
45 catheter kits within the institution, but not yet utilized on a regular basis, we also sought to  
46 identify the potential barriers to implementation of a new SED in the healthcare environment.  
47  
48  
49  
50  
51  
52  
53  
54  
55  
56  
57  
58  
59  
60



1  
2  
3  
4  
5  
6 We hypothesized that a substantial number of NSIs occur during resident placement of CVCs  
7  
8 and could potentially be prevented by use of the SED. However, barriers to the utilization of this  
9  
10 SED, including lack of training on the use of the device and staff resistance are likely to impede  
11  
12 implementation of safety controls.  
13

## 14 15 16 17 18 **METHODS**

19  
20 Institutional review board approval was obtained and all NSI data were de-identified. The study  
21  
22 was conducted at Hahnemann University Hospital (HUH), an urban tertiary care hospital in the  
23  
24 United States. We analyzed retrospective data on all NSIs reported between July 2007 and  
25  
26 June 2011 by HCWs in the adult-care ACGME resident training programs (except  
27  
28 neurosurgery).  
29

30  
31  
32  
33  
34 NSI cost was determined by adding the required charges for a “minimal risk” NSI. For the  
35  
36 purpose of this study, a minimal risk NSI was defined as an NSI for which the HCW has a low  
37  
38 risk for sero-conversion to Hepatitis or HIV viral infection. When this type of NSI occurs, both  
39  
40 the HCW and source patient would be tested for HIV and Hepatitis B and C immediately after  
41  
42 the NSI. The sum of the charges for the required occupational health appointments and initial  
43  
44 lab tests represents the lowest possible cost of a NSI in USD. When the potential risk of  
45  
46 transmission of Hepatitis or HIV infection is considered greater, the HCW may be prescribed  
47  
48 prophylactic medications and requires repeat tested at regular intervals up to a year after a NSI,  
49  
50 significantly increasing the costs associated with NSI.  
51  
52  
53  
54  
55  
56  
57  
58  
59  
60

1  
2  
3 Ninety-five residents from surgery, emergency medicine, internal medicine, and anesthesia  
4 programs, the disciplines responsible for CVC placement at our institution, were identified and  
5 enrolled in the study. All participants signed written consent to participate. Demographic data for  
6 each of the residents were collected, including level of training, department, age, sex, race, and  
7 handedness. Survey questions were designed to determine residents' prior exposure to NSIs  
8 and to evaluate their prior knowledge of and experience with the StatLock device.  
9  
10  
11  
12  
13  
14  
15  
16  
17  
18

19 Finally, a focus group of six randomly selected residents was conducted to assess impressions  
20 of the device and to identify potential barriers to its implementation. Participants were  
21 interviewed by a study investigator (SG) individually and each session was audio recorded with  
22 the permission of the participant. During the focus group sessions, participants were asked to  
23 discuss their impressions of the SED, and additional thoughts they had on the use of this  
24 alternative method as compared to traditional sutures when securing central lines. These  
25 discussions were recorded so that they could be later analyzed by two independent study  
26 investigators (SG and AB).  
27  
28  
29  
30  
31  
32  
33  
34  
35  
36  
37  
38  
39

#### 40 **Data analysis**

41  
42 De-identified data on all NSIs occurring at our institution were independently reviewed by three  
43 study investigators (SG, AB, CR). All reported NSIs were reviewed and characterized according  
44 to occupation of the HCW incurring the injury (Figure 2) and according to circumstances  
45 regarding the injury. Frequency counts of physician NSIs that occurred during a catheter  
46 placement such as a CVC, large bore single lumen catheter, dialysis catheter, or arterial  
47 catheter line were also reviewed by the same three investigators and compared for agreement  
48 in interpretation. After the focus group sessions, two independent study investigators  
49  
50  
51  
52  
53  
54  
55  
56  
57  
58  
59  
60

1  
2  
3 categorized the residents' statements as neutral, positive, or negative observations regarding  
4 the StatLock device.  
5  
6  
7  
8  
9

## 10 **RESULTS**

### 11 **Retrospective institutional data analysis**

12  
13 Analysis of the retrospective NSI data revealed that physicians (residents, fellows, and  
14 attendings) accounted for 43% (136 of 314) of the total NSIs occurring between July 2007 and  
15 June 2011 (Figure 2). Resident NSIs accounted for 87% (118 of 136) of the total physician  
16 NSIs occurring during this 4-year period. Analysis of the circumstances surrounding each NSI  
17 showed that 40 NSIs occurred during the placement of CVCs or other catheter lines that  
18 required securement to patient skin. Fifty-three percent (21 of 40) of the NSIs that occurred  
19 during these procedures occurred specifically while the line was being secured to the patient's  
20 skin with a suture needle. This accounted for 16% (21 of 131) of the total number of resident  
21 and fellow NSIs over the 4-year period. It is possible that 13 additional NSIs occurred during  
22 securement of these catheter lines, but unless our occupational health record specifically  
23 documented that the NSI occurred while the worker was securing the line to the patient's skin,  
24 those data were not included. The remaining six NSIs that occurred during placement of a CVC  
25 or other invasive catheter occurred with the large-bore needle while the physician was  
26 attempting to cannulate the vessel.  
27  
28  
29  
30  
31  
32  
33  
34  
35  
36  
37  
38  
39  
40  
41  
42  
43  
44  
45  
46  
47  
48

### 49 **Cost analysis**

50  
51 Given the number of NSIs determined from retrospective analysis, we calculated that use of a  
52 needleless device to secure the CVC could have prevented 21 NSIs. The cost analysis  
53 estimates that each NSI incurs at least \$2,723 USD in charges at this institution. Table 1 lists  
54  
55  
56  
57  
58  
59  
60

1  
2  
3 the minimal charges associated with a low risk NSI using data from our institution's  
4  
5 Occupational Health Clinic. While the calculations for this study represent the lowest possible  
6  
7 cost of a NSI, the actual cost of a NSI varies from case to case depending on the circumstances  
8  
9 surrounding the NSI, the treatment plan, medication requirements, and frequency of follow-up  
10  
11 visits. If the HCW has a high risk exposure to HIV, prophylactic antiviral medications must be  
12  
13 prescribed and the cost of the medications, additional labwork, and frequent follow-up visits  
14  
15 increases the cost of the NSI significantly. The cost estimates also do not include the indirect  
16  
17 cost of time lost from work and other indirect financial and social costs. Eliminating all 21 NSIs  
18  
19 that definitively occurred during securement of a CVC would have translated into a savings of at  
20  
21 least \$57,183 in USD charges.. If the additional 13 NSIs that possibly occurred during the  
22  
23 securement phase were also prevented, the cost savings would be at least \$92,582 over the 4-  
24  
25 year period.  
26  
27  
28  
29  
30  
31

### 32 **Survey of residents**

33  
34  
35 Of the 95 residents surveyed, only 30% had previous knowledge of the needleless SED that is  
36  
37 supplied in all CVC safety kits at our institution. Only 19% had ever had training regarding the  
38  
39 use of any SED or used the device in clinical practice. Twenty-seven percent of residents  
40  
41 surveyed stated that they had had at least one close call needlestick incident in the past 2  
42  
43 months. And 20% of the residents surveyed had at least two near miss/close call needlestick  
44  
45 incident in the past 2 months. (Figure 4). Twenty-five percent of responding residents (24 of 95)  
46  
47 answered yes when asked the question, "Have you ever had a needlestick injury associated  
48  
49 with patient body fluid exposure?" In a follow-up question, we asked, "Did you report the incident  
50  
51 each time?" Twenty-one percent (5 of 24) responded that they did not always report NSI. This  
52  
53 finding is consistent with prior data suggesting that HCW NSIs are underreported<sup>3-6</sup>.  
54  
55  
56  
57  
58  
59  
60

### Focus group data

Data from discussions with six randomly selected study participants are presented in Table 2. Statements regarding each residents' experience with Statlock were categorized into positive, negative, or neutral. Opinions of the SED and experiences varied across participants. In general, those residents who were comfortable and adept at suturing, especially surgical residents, seemed to prefer using sutures over the Statlock device. According to the responses, the use of the SED may also be dependent on patient characteristics, situational circumstances, and knowledge or acceptance of the SED by other HCWs. One resident indicated that she would want additional practice with the device before using it in a clinical setting, suggesting that additional training may encourage increased use of the SED.

### DISCUSSION

In 2009 we developed a partnership with our institutional industrial hygienist to investigate opportunities to reduce NSIs among resident physicians in our institution. In the fiscal year between 2008 and 2009, nurse NSIs increased 10% and physician NSIs increased 70% at our institution. In 2009 at HUH, 46% of the total reported NSIs involved residents. A 2007 study of 699 surgical residents at 17 US medical centers found that by the 5<sup>th</sup> year of residency, 99% had had at least one NSI. Moreover, for 53% of respondents, the NSI had involved a high-risk patient with a history of HIV infection, hepatitis B or C virus infection, or injection drug use.<sup>2</sup> In 2009, our US-based urban hospital reported 27.6 injuries per 100 occupied beds, which is above the EPINet average of 20.1 for teaching hospitals<sup>7</sup>. Despite increased awareness of sharps injuries and some attempts at prevention, NSIs continue to be a serious problem. Our study supported earlier research findings that among HCWs, physicians have the highest risk of NSI<sup>2, 10</sup>, and among physicians, residents have a three times greater risk of blood and body

1  
2  
3 fluids exposure than senior doctors<sup>11</sup>. These data were alarming and required immediate  
4  
5 analysis for the potential for intervention.  
6  
7  
8  
9

10  
11 In medicine, engineering controls that have been introduced to decrease the incidence of NSIs  
12 among HCWs include safety-winged steel needles, safety intravenous catheter insertion  
13 needles, polyester film-coated capillary tubes, safety-shielded phlebotomy needles, needleless  
14 blood transfer devices, safety peripherally inserted central catheter stylets, blood gas needle-  
15 holding devices, blunt-tip needles, and shielded hypodermic needles/syringes<sup>8</sup>. Current  
16 literature indicates that 29% to 35% of reported occupational NSIs could have been prevented if  
17 an SED had been used<sup>9</sup>. Although engineering controls may require capital investment, the  
18 cost savings resulting from improved safety may justify the expense. However, devices that  
19 depend on user activation generate benefit only when correctly used; thus HCWs must be  
20 educated in their use.  
21  
22  
23  
24  
25  
26  
27  
28  
29  
30  
31  
32  
33  
34

35 For some HCW their lack of training and their unfamiliarity with SEDs is a major barrier to its  
36 use. Only 30% in our study had previous knowledge of the needleless SED that is supplied in  
37 all CVC safety kits at our institution. Only 19% had ever used the device in clinical practice.  
38 Exposure to the SED and effective training may encourage the use of SEDs and subsequently  
39 reduce NSI. A prospective cohort study using the same 95 residents who participated in this  
40 survey has been designed to determine the best means of educating residents on the use of the  
41 Statlock device. Each resident was randomly assigned to either a standard teaching video or a  
42 simulation curriculum involving both the video teaching plus hands-on practice in a simulated  
43 clinical environment. The endpoint for the longitudinal phase of the study was defined as a  
44 difference in NSIs between the groups. Additionally, all participants agreed to return in 12  
45  
46  
47  
48  
49  
50  
51  
52  
53  
54  
55  
56  
57  
58  
59  
60

1  
2  
3 months for a repeat questionnaire on their attitudes and experience with the SED. This portion  
4  
5 of the study is still in progress.  
6  
7

8  
9  
10 In our institution, some residents who are already familiar with Statlock have been reluctant to  
11  
12 use it because they have questions about efficacy and patient safety. Some express concern  
13  
14 that the device might not work as well as the traditional method of securing a CVC to patients'  
15  
16 skin using sutures. Many reports in the literature have been authored by individuals associated  
17  
18 with the manufacturers, raising the question of potential bias. The StatLock device is currently  
19  
20 available in every triple-lumen CVC kit in our institution. Therefore, the issue of use of the  
21  
22 device does not rest on its availability, but rather on physician awareness, training, and  
23  
24 preference.  
25  
26

27  
28  
29 Focus group discussions revealed that such factors have indeed presented barriers to  
30  
31 implementation of the SED. Residents expressed concern regarding time constraints and  
32  
33 familiarity with device. Previous literature has documented similar barriers to implementation.  
34  
35 Cost, personnel time, and resistance to change are several of the most commonly documented  
36  
37 deterrents.<sup>6, 12-16</sup> Surgeons and anesthesiologists have been recognized as the cohorts least  
38  
39 likely to use safety devices designed to prevent NSIs, presumably because they are skilled at  
40  
41 suturing.<sup>17</sup> Reluctance may also stem from feelings of discomfort and questions of efficacy.<sup>17</sup>  
42  
43 Evidence-based reasoning is often absent from the foundation of implementation programs,  
44  
45 exacerbating opposition to change.<sup>18</sup> Perpetual access to conventional sharps also hinders  
46  
47 implementation of safety devices.<sup>19</sup>  
48  
49  
50

51  
52  
53 Some institutions have recognized that simple logistics can prevent staff from using safety-  
54  
55 engineered devices. Contractual purchasing agreements can render devices unavailable and  
56  
57 certain devices may not be compatible with existing equipment<sup>6, 16</sup>. The overabundance of SEDs  
58  
59  
60

1  
2  
3 on the market makes it difficult for institutions to choose<sup>15</sup>, yet most devices are not applicable  
4  
5 for all situations and technology must become more advanced to meet the remaining  
6  
7 demand.<sup>15,18</sup>  
8  
9

10  
11 Lastly, HCWs are characterized as being desensitized to disease and consequently possessing  
12  
13 a false sense of security regarding the effects of NSIs.<sup>17</sup> When this complacency is coupled  
14  
15 with a lack of multidisciplinary support, both “horizontally and vertically,” implementation of  
16  
17 safety devices becomes extremely difficult.<sup>20</sup>  
18  
19

## 20 21 22 23 **CONCLUSIONS**

24  
25 The common incidence of NSIs among healthcare workers clearly indicates a need for further  
26  
27 intervention. Retrospective analysis of institutional records demonstrated that over a 4-year  
28  
29 period (July 2007–June 2011), 16% of resident/fellow NSIs (21 of 131) could have been avoided  
30  
31 with the use of a needleless securement device such as the Statlock device. While such SEDs  
32  
33 are currently available, they are infrequently used by HCWs for various reasons. The  
34  
35 implementation of an SED in an institution requires proof of safety and efficacy as well education  
36  
37 and training of healthcare workers to encourage the use of the device and reduce the number of  
38  
39 NSIs among physicians.  
40  
41

## 42 43 **Funding**

44  
45 This study was supported by Drexel College of Medicine IBC Simulation Grant Funding. The  
46  
47 funding source had no involvement in the study design; collection, analysis or interpretation  
48  
49 data; writing of the report; nor the decision to submit the paper for publication.  
50  
51

## 52 53 54 **Contributorship**



1  
2  
3 Dr Griswold-Theodorson had access to and takes responsibility for the integrity of the data and the  
4 accuracy of the data analysis. Dr Griswold-Theodorson: contributed to study conception and design,  
5 data collection, analysis and interpretation of the data, drafting of the manuscript, and critical revision  
6 of the article for important intellectual content.  
7

8  
9  
10  
11 Ms Bonaroti: contributed to study design, data collection, data analysis and interpretation, reviewing  
12 and editing of the manuscript, and critical revision of the article for important intellectual content.  
13

14  
15  
16 Mr Rieder: contributed to study design, data collection and analysis, review and editing of the  
17 manuscript.  
18

19  
20  
21 Mr Erbayri: contributed to study design, data collection and analysis, review and editing of the  
22 manuscript.  
23

24  
25  
26 Dr Parsons: contributed to study design, data collection, data analysis and interpretation, reviewing,  
27 editing, and section writing of the manuscript.  
28

29  
30  
31 Dr Nocera: contributed to study design, data collection and data interpretation, reviewing, editing,  
32 section writing of the manuscript and critical revision of the article for important intellectual content.  
33

34  
35  
36 Dr Hamilton: contributed to interpretation of the data, reviewing, and editing of the manuscript and  
37 critical revision of the article for important intellectual content.  
38

### 39 40 41 42 43 **Data Sharing**

44  
45  
46 There is no additional unpublished data.  
47

### 48 49 50 **Competing Interests**

51  
52  
53  
54 None  
55  
56  
57  
58  
59  
60

1  
2  
3 Figure 1. Right infraclavicular subclavian triple-lumen catheter secured with StatLock needleless  
4 device (Bard Access Systems, Salt Lake City, UT). The StatLock needleless device replaces  
5 the need for suturing with a locking device secured with benzoin and tape.  
6  
7  
8  
9

10 Figure 2. NSI injury at Hahnemann Hospital by occupation from four year period: July 1, 2007 to  
11 June 30, 2011. MD includes residents, attendings, and fellows. Nurse: includes nurses, nurse  
12 anesthesia, and nurse practitioners. Others include respiratory therapy, environmental services,  
13 laboratory personnel and others not categorized above.  
14  
15  
16  
17  
18  
19

20 Figure 3. Close calls involving needlestick injuries witnessed in the 2 months preceding survey  
21 administration in July 2011.  
22  
23

24 Table 1. Minimal charges associated with a low risk needlestick injury at Hahnemann Hospital.  
25  
26

27 Table 2. Data extracted from discussions with six randomly selected focus group participants.  
28  
29  
30  
31  
32  
33  
34  
35  
36  
37  
38  
39  
40  
41  
42  
43  
44  
45  
46  
47  
48  
49  
50  
51  
52  
53  
54  
55  
56  
57  
58  
59  
60

## References

1. Consensus Statement and Call to Action on Sharps Safety released March 2012: International Healthcare Worker Safety Center, 2012.  
<http://www.healthsystem.virginia.edu/pub/epinet/home.html>. Retrieved November 1, 2012.
2. Makary MA, Al-Attar A, Holzmüller CG, et al. Needlestick injuries among surgeons in training. *New England Journal of Medicine* 2007;356(26):2693-9.
3. Elliott SKF, Keeton A, Holt A. Medical students' knowledge of sharps injuries. *Journal of Hospital Infection* 2005;60(4):374-77.
4. Yamamoto AJ, Solomon JA, Soulen MC, et al. Sutureless Securement Device Reduces Complications of Peripherally Inserted Central Venous Catheters. *Journal of Vascular and Interventional Radiology* 2002;13(1):77-81.
5. Trim JC, Elliott TSJ. A review of sharps injuries and preventative strategies. *Journal of Hospital Infection* 2003;53(4):237-42.
6. (OSHA) OSHA. Record Summary of the Request for Information on Occupational Exposure to Bloodborne Pathogens. In: Labor USDo, editor, 1999.
7. EPINet. <http://healthsystem.virginia.edu/internet/epinet/EPINet-2007-rates.pdf>, 2007. Retrieved October 10, 2012.
8. Dement JM, Epling C, Østbye T, et al. Blood and body fluid exposure risks among health care workers: Results from the Duke Health and Safety Surveillance System. *American Journal of Industrial Medicine* 2004;46(6):637-48.
9. Elder A, Paterson C. Sharps injuries in UK health care: a review of injury rates, viral transmission and potential efficacy of safety devices. *Occupational Medicine* 2006;56(8):566-74.

- 1  
2  
3 10. Wicker S, Jung J, Allwinn R, et al. Prevalence and prevention of needlestick injuries among health  
4  
5 care workers in a German university hospital. *International Archives of Occupational and*  
6  
7 *Environmental Health* 2008;81(3):347-54.  
8  
9  
10 11. Naghavi SHR, Sanati KA. Accidental blood and body fluid exposure among doctors. *Occupational*  
11  
12 *Medicine* 2009;59(2):101-06.  
13  
14 12. Sharps Injuries Among Medical Trainees. In: Occupational Health Surveillance Program MDoPH,  
15  
16 editor. Boston, 2011.  
17  
18 [http://www.mass.gov/Eeohhs2/docs/dph/occupational\\_health/injuries\\_medical\\_trainees\\_02\\_0](http://www.mass.gov/Eeohhs2/docs/dph/occupational_health/injuries_medical_trainees_02_0)  
19  
20 9.pdf. Retrieved November 1, 2012.  
21  
22  
23 13. Jagger J, Perry J, Goma A, et al. The impact of U.S. policies to protect healthcare workers from  
24  
25 bloodborne pathogens: The critical role of safety-engineered devices. *Journal of Infection and*  
26  
27 *Public Health* 2008;1(2):62-71.  
28  
29  
30 14. Vason BJ. The safety needle switchover, part 1 of 2. *Nursing Management* 2002;33(5):33-6.  
31  
32  
33 15. Pegues DAMD. Building Better Programs to Prevent Transmission of Blood-Borne Pathogens to  
34  
35 Healthcare Personnel: Progress in the Workplace, But Still No End in Sight •. *Infection Control*  
36  
37 *and Hospital Epidemiology* 2003;24(10):719-21.  
38  
39  
40 16. Sohn SMPH, Eagan JRN, Sepkowitz KAMD, et al. Effect of Implementing Safety-Engineered Devices  
41  
42 on Percutaneous Injury Epidemiology. *Infection Control and Hospital Epidemiology*  
43  
44 2004;25(7):536-42.  
45  
46  
47 17. Guglielmi CL, Spratt DG, Berguer R, et al. A Call to Arms to Prevent Sharps Injuries in Our ORs.  
48  
49 *Association of Operating Room Nurses. AORN Journal* 2010;92(4):387-92.  
50  
51  
52 18. Hall J. Worker safety: A road well-traveled, yet so far to go. *Healthcare Purchasing News*  
53  
54 2003;27(8):46-46.  
55  
56  
57  
58  
59  
60

1  
2  
3 19. AORN. Seeking solutions to increase sharps safety. *Association of Operating Room Nurses Journal*  
4  
5 2011;94(6):C1-C1,C8,C9.  
6

7  
8 20. Hagstrom AM. Perceived Barriers to Implementation of a Successful Sharps Safety Program.  
9  
10 *Association of Operating Room Nurses. AORN Journal* 2006;83(2):391-7.  
11  
12

13  
14  
15  
16  
17  
18  
19  
20  
21  
22  
23  
24  
25  
26  
27  
28  
29  
30  
31  
32  
33  
34  
35  
36  
37  
38  
39  
40  
41  
42  
43  
44  
45  
46  
47  
48  
49  
50  
51  
52  
53  
54  
55  
56  
57  
58  
59  
60

For peer review only

1  
2  
3  
4  
5  
6  
7  
8  
9  
10  
11  
12  
13  
14  
15  
16  
17  
18  
19  
20  
21  
22  
23  
24  
25  
26  
27  
28  
29  
30  
31  
32  
33  
34  
35  
36  
37  
38  
39  
40  
41  
42  
43  
44  
45  
46  
47  
48  
49  
50  
51  
52  
53  
54  
55  
56  
57  
58  
59  
60

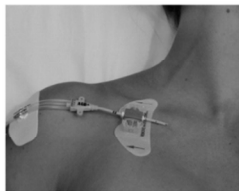

Figure 1. Right infraclavicular subclavian triple lumen catheter secured with SED needleless device. The device replaces the need for suturing with a locking device secured with benzoin

386x90mm (300 x 300 DPI)

or peer review only

1  
2  
3  
4  
5  
6  
7  
8  
9  
10  
11  
12  
13  
14  
15  
16  
17  
18  
19  
20  
21  
22  
23  
24  
25  
26  
27  
28  
29  
30  
31  
32  
33  
34  
35  
36  
37  
38  
39  
40  
41  
42  
43  
44  
45  
46  
47  
48  
49  
50  
51  
52  
53  
54  
55  
56  
57  
58  
59  
60

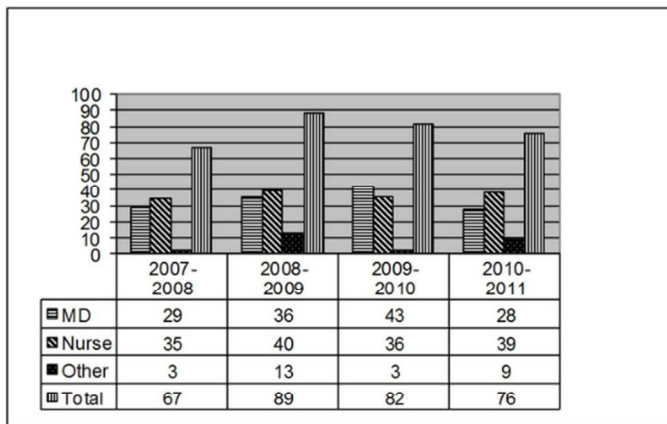

Figure 2. NSI injury at Hahnemann Hospital by occupation from four year period: July 1, 2007 to June 30, 2011. MD includes residents, attendings, and fellows. Nurse: includes nurses, nurse anesthesia, and nurse practitioners. Others include respiratory therapy, environmental services, laboratory personnel and others

145x90mm (300 x 300 DPI)

Review only

1  
2  
3  
4  
5  
6  
7  
8  
9  
10  
11  
12  
13  
14  
15  
16  
17  
18  
19  
20  
21  
22  
23  
24  
25  
26  
27  
28  
29  
30  
31  
32  
33  
34  
35  
36  
37  
38  
39  
40  
41  
42  
43  
44  
45  
46  
47  
48  
49  
50  
51  
52  
53  
54  
55  
56  
57  
58  
59  
60

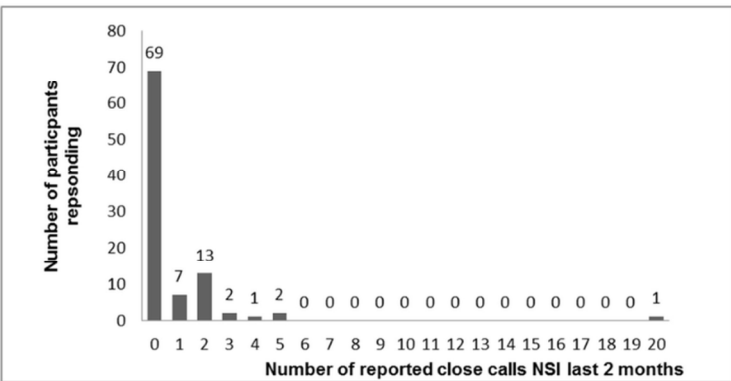

Figure 3. Close calls involving needlestick injuries witnessed in the 2 months preceding survey administration in July 2011.

200x90mm (300 x 300 DPI)

Peer review only



| <b>Table 1. Needlestick Injury Costs Per Incident<br/>Occupational Health Charges</b> |                                                                             |                                                                                             |
|---------------------------------------------------------------------------------------|-----------------------------------------------------------------------------|---------------------------------------------------------------------------------------------|
|                                                                                       | <b>2011 USD<br/>charges<br/>for<br/>“minimal<br/>risk” HCW<br/>exposure</b> | <b>Additional<br/>charges if<br/>more<br/>follow up<br/>visits<br/>deemed<br/>necessary</b> |
| <b>Office Visit (during weekday<br/>business hours)</b>                               |                                                                             |                                                                                             |
| Initial visit                                                                         | \$240                                                                       |                                                                                             |
| Each additional follow up visit                                                       |                                                                             | \$76                                                                                        |
| <b>Lab Costs</b>                                                                      |                                                                             |                                                                                             |
| <b>HIV 1,2 Antibody Test</b>                                                          |                                                                             |                                                                                             |
| Initial source patient                                                                | \$533                                                                       |                                                                                             |
| HCW testing at baseline and each<br>follow up interval                                |                                                                             | \$533                                                                                       |
| <b>Hepatitis B Panel</b>                                                              |                                                                             |                                                                                             |
| Initial source patient                                                                | \$511                                                                       |                                                                                             |
| HCW testing at baseline and each<br>follow up interval                                |                                                                             | \$511                                                                                       |
| <b>Hepatitis C Panel</b>                                                              |                                                                             |                                                                                             |
| Initial source patient                                                                | \$863                                                                       |                                                                                             |
| HCW testing at baseline and each<br>follow up interval                                |                                                                             | \$863                                                                                       |
| <b>Total Cost</b>                                                                     | \$2732                                                                      | Varies by<br>Number of<br>follow up<br>visits<br>required                                   |

Table 2. Data extracted from six randomly selected focus group participants

| Neutral comments                                                                                      | Positive comments                                                                                                                                                                                                                           | Negative comments                                                                                                               |
|-------------------------------------------------------------------------------------------------------|---------------------------------------------------------------------------------------------------------------------------------------------------------------------------------------------------------------------------------------------|---------------------------------------------------------------------------------------------------------------------------------|
| [I] would want more practice with applying the StatLock device before using it in a clinical setting. | “[I] am motivated to use StatLock after witnessing multiple coworkers experience fingersticks.”                                                                                                                                             | “Time is of the essence. [I] don’t want to wait for StatLock to dry when sutures are faster, more efficient, more comfortable.” |
|                                                                                                       | After using the StatLock device just one time, one resident found that the placement of the StatLock device was quicker than suturing the CVC.                                                                                              | Some residents were hesitant to use the device because the nurses and other practitioners lacked knowledge of the device.       |
|                                                                                                       | Two of the 6 residents reported that they valued the StatLock device in certain situations when they were more likely to incur an NSI. One stated this was particularly useful when the patient is unpredictable or unwilling to lie still. | “The admitting team was confused, did not know what device was, and [was] concerned over whether StatLock would stay in place.” |
|                                                                                                       | One stated that the device                                                                                                                                                                                                                  | Resistance to StatLock due                                                                                                      |

|  |                                                         |                                                                   |
|--|---------------------------------------------------------|-------------------------------------------------------------------|
|  | may be useful especially for patients who form keloids. | to familiarity with suturing, especially among surgical residents |
|--|---------------------------------------------------------|-------------------------------------------------------------------|

For peer review only

1  
2  
3 1 **Investigation of a safety-engineered device to prevent needlestick injury:**

4  
5 2 **Why hasn't StatLock stuck?**

6  
7 3  
8  
9 4 **Sharon Griswold<sup>1</sup>, Alisha Bonaroti<sup>1</sup>, Christopher J. Rieder<sup>2</sup>, John Erbayri<sup>1</sup>, Jessica**  
10  
11 5 **Parsons<sup>1</sup>, Romy Nocera<sup>1</sup>, Richard Hamilton<sup>1</sup>**

12  
13 6  
14  
15 7 **<sup>1</sup>Department of Emergency Medicine, Drexel University College of Medicine, Philadelphia,**  
16  
17 8 **PA**

18  
19 9 **<sup>2</sup>Department of Security and Safety, Senior Industrial Hygienist, Hahnemann University**  
20  
21 10 **Hospital, Philadelphia, PA**

22  
23 11 **Corresponding Author:**

24  
25 12 Sharon Griswold, MD, MPH  
26  
27 13 Simulation Center Director  
28  
29 14 Drexel University College of Medicine  
30  
31 15 Department of Emergency Medicine, NCB  
32  
33 16 Room 2108, 2nd floor, MS 1011  
34  
35 17 245 North 15th Street  
36  
37 18 Philadelphia, PA 19102  
38  
39 19 phone 215-762-2368  
40  
41 20 fax 215-762-1307  
42  
43 21 email [sgriswol@drexelmed.edu](mailto:sgriswol@drexelmed.edu)  
44  
45 22  
46  
47  
48  
49  
50  
51  
52  
53  
54  
55  
56  
57  
58  
59  
60

## Article Summary

## Article Focus

This article sought to ~~define~~ determine whether an alternative safety engineered device (SED) could ~~potentially help~~ prevent needlestick injury (NSI) in healthcare workers (HCWs) who place central venous catheters (CVC). It also aims to identify potential reasons why an available SED is not utilized by HCW. To begin to answer these questions the study involved three phases:

1. A retrospective analysis of de-identified occupational health records from our tertiary care urban United States (US) hospital to clearly identify how many HCW had NSI while placing CVC.
2. Ninety-five residents who frequently place CVC during training were surveyed regarding their knowledge and experience with NSIs and SEDs.
3. A random sample of six residents participated in a focus group session discussing barriers to use of the SED.

## Key Messages

- ~~A readily available safety-engineered device does exist as an alternative to using three sharps to suture a CVC.~~
- Sixteen percent (21 of 131) of NSIs occurring in residents and fellows over a 4-year period (July 2007–June 2011) ~~in~~ a single institution occurred during securement of an invasive catheter despite a readily available safety-engineered device that would eliminate the need for sharps during this part of invasive catheter insertion.
- If safety and efficacy of the device can be proven, 5.25 healthcare worker NSIs per year could be avoided at our institution. This would translate into a ~~direct cost~~ savings of at least \$57,18319,362 in charges associated with NSIs over the 4-year period.

- 1  
2  
3 49 • Introduction of SED in an hospital should be accompanied by education, detailed  
4  
5 50 information, and training of healthcare workers to encourage utilization of the device.  
6  
7  
8 51

9  
10 52 **Strengths and Limitations**

- 11  
12 53 • A notable strength of this work is that it addresses the International Healthcare Worker  
13  
14 54 Safety Center March 2012<sup>1</sup> call to action to address a lack of new progress in NSI rates.  
15  
16 55 The study identifies a new area where significant progress may be made to reduce  
17  
18 56 sharps injuries worldwide.  
19  
20  
21 57 • A significant limitation is that the study is currently limited to a single US tertiary care  
22  
23 58 site.  
24  
25  
26 59

27 60 Keywords: needlestick injury; sharps injury; safety-engineered device; healthcare worker injury;  
28  
29 61 central venous catheter  
30  
31  
32 62

33  
34 63 **ABSTRACT**

35  
36 64  
37  
38 65 Objective: This article sought to define whether an alternative safety engineered device (SED)  
39  
40 66 could help prevent needlestick injury (NSI) in healthcare workers (HCWs) who place central  
41  
42 67 venous catheters (CVC).  
43  
44

45 68 Design: The study involved three phases: 1) A retrospective analysis of de-identified  
46  
47 69 occupational health records from our tertiary care urban US hospital to clearly identify NSI risk  
48  
49 70 and rates to HCW during invasive catheter placement; 2) Ninety-five residents were surveyed  
50  
51 71 regarding their knowledge and experience with NSIs and SEDs. 3) A random sample of six  
52  
53 72 residents participated in a focus group session discussing barriers to use of the SED.  
54

55 73 Setting: A single urban US tertiary care teaching hospital.  
56  
57  
58  
59  
60

1  
2  
3 74 Participants: A retrospective analysis of NSI to HCW in a tertiary care urban US hospital was  
4  
5 75 conducted over a 4-year period (July 2007–~~June~~<sup>July</sup> 2011). Ninety-five residents from specialties  
6  
7 76 that often place CVC during training (surgery, surgical subspecialties, internal medicine,  
8  
9 77 anesthesia and emergency medicine) were surveyed regarding their experience with NSIs and  
10  
11 78 SEDs. A random sample of six residents participated in a focus group session discussing  
12  
13 79 barriers to use of the SED.  
14  
15

16 80 Results: 314 NSIs were identified via occupational health records. Sixteen percent (21 of 131) of  
17  
18 81 NSIs occurring in residents and fellows occurred during securement of an invasive catheter  
19  
20 82 such as a CVC. If an SED device had been used, these 5.25 NSIs/year could have been  
21  
22 83 avoided. Each NSI occurring in an HCW incurred ~~an estimated average direct cost of \$922~~  
23  
24 84 at least \$2,723 in charges. Thus, utilization of the SED could have saved a minimum of  
25  
26 85 \$57,183~~49,362~~ over the 4-year period.  
27  
28

29 86 Conclusion: SEDs are currently available and can be used as an alternative to sharps. If safety  
30  
31 87 and efficacy can be demonstrated, then implementation of such devices can significantly reduce  
32  
33 88 the number of NSIs.  
34  
35

36 89  
37  
38 90 There is no additional data available  
39  
40  
41

## 42 92 **INTRODUCTION**

43  
44  
45 93 Needlestick or sharps injuries (NSIs) among healthcare workers (HCWs) are a common and  
46  
47 94 potentially avoidable injury. An estimated 600,000 to 800,000 percutaneous injuries occur  
48  
49 95 annually among HCWs in the United States<sup>2</sup>. As high as these estimates appear, the literature  
50  
51 96 indicates that sharps injuries are significantly underreported<sup>3-5</sup>. These injuries place HCWs at  
52  
53 97 risk for blood-borne infections and result in considerable psychological distress. In addition, the  
54  
55  
56  
57  
58  
59  
60

1  
2  
3 98 healthcare system incurs substantial costs from the occupational health testing, prophylaxis,  
4  
5 99 and follow-up that must be implemented for each reported NSI.  
6  
7

8 100

9  
10 101 Safety-engineered devices (SEDs) are promising design innovations intended to prevent  
11  
12 102 hazards and accidents. In medicine, numerous engineering controls have been introduced to  
13  
14 103 decrease the incidence of NSIs among HCWs, including safety-winged steel needles, safety  
15  
16 104 intravenous catheter insertion needles, and many others.  
17  
18  
19

20 105

21  
22  
23 106 The StatLock device (Bard Access Systems, Salt Lake City, UT) (Figure 1) is an SED designed  
24  
25 107 to prevent NSIs during placement of central venous catheters (CVCs). It is a locking device that  
26  
27 108 secures CVCs to the skin with benzoin adhesive instead of the traditional method of using  
28  
29 109 sutures to secure CVCs to skin. Traditionally, after a CVC is placed the patient may require  
30  
31 110 additional local anesthesia in a site separate from the insertion site, necessitating the use of a  
32  
33 111 hollow-bore needle for lidocaine injection. Then, a straight suture needle is used to suture the  
34  
35 112 CVC to the patient's skin. After making a knot with the suture, the ends are then cut with a  
36  
37 113 scalpel. Therefore, using the SED minimizes the risk of NSI during securement of CVC by  
38  
39 114 eliminating three steps during which sharps are used. Despite the easy availability of the  
40  
41 115 StatLock device, few resident physicians are aware of it and fewer still have used it in clinical  
42  
43 116 practice.  
44  
45  
46  
47  
48  
49

50 117

51 118 ~~This SED StatLock device~~ has been available in all adult triple-lumen CVC kits in our urban  
52  
53 119 tertiary care US institution since July 2009. Despite its availability, the ~~SED StatLock~~ is not widely  
54  
55 120 used in clinical practice. The purpose of our study was to perform a needs analysis by  
56  
57 121 retrospectively examining HCW data from our institution to determine whether implementation of  
58  
59  
60



1  
2  
3 122 the SED would significantly reduce NSIs. We sought to determine whether practitioners did  
4  
5 123 incur NSIs during the securement phase of the CVC procedure, and if this could have been  
6  
7 124 prevented with the use of this SED. Since this SED device has already been readily available in  
8  
9 125 the safety triple lumen catheter kits within the institution, but not yet utilized on a regular basis,  
10  
11 126 we also sought to identify the potential barriers to implementation of a new SED in the  
12  
13 127 healthcare environment. ~~The SED device was readily available in the safety triple lumen~~  
14  
15 128 ~~catheter kits within the institution yet not utilized within the institution.~~  
16  
17  
18  
19 129

20  
21 130 We hypothesized that a substantial number of NSIs occur during resident placement of CVCs  
22  
23 131 and could potentially ~~which might~~ be prevented by use of the ~~SED~~ atLock device. However,  
24  
25 132 barriers to the utilization of this SED, including lack of training on the use of the device and staff  
26  
27 133 resistance are likely to impede implementation of safety controls.  
28  
29  
30  
31 134

## 32 33 135 **METHODS**

34  
35 136 Institutional review board approval was obtained and all NSI data were de-identified. The study  
36  
37 137 was conducted at Hahnemann University Hospital (HUH), an urban tertiary care hospital in the  
38  
39 138 United States. We analyzed retrospective data on all NSIs reported between July 2007 and  
40  
41 139 ~~June~~ July 2011 by HCWs in the adult-care ACGME resident training programs (except  
42  
43 140 neurosurgery).  
44  
45  
46  
47 141

48  
49 142 NSI cost was determined by adding the required charges for a “minimal risk” NSI. For the  
50  
51 143 purpose of this study, a minimal risk NSI was defined as an NSI for which the HCW has a low  
52  
53 144 risk for sero-conversion to Hepatitis or HIV viral infection. When this type of NSI occurs, both  
54  
55 145 the HCW and source patient would be tested for HIV and Hepatitis B and C immediately after  
56  
57  
58  
59  
60

1  
2  
3 146 the NSI. The sum of the charges for the required occupational health appointments and initial  
4  
5 147 lab tests represents the lowest possible cost of a NSI in USD. When the potential risk of  
6  
7 148 transmission of Hepatitis or HIV infection is considered greater, the HCW may be prescribed  
8  
9 149 prophylactic medications and requires repeat tested at regular intervals up to a year after a NSI,  
10  
11 150 significantly increasing the costs associated with NSI.  
12  
13  
14  
15 151

16  
17 152 Ninety-five residents from surgery, emergency medicine, internal medicine, and anesthesia  
18  
19 153 programs, the disciplines responsible for CVC placement at our institution, were identified and  
20  
21 154 enrolled in ~~a prospective longitudinal~~the study: ~~surgery, emergency medicine, internal medicine,~~  
22  
23 155 ~~and anesthesia.~~ All participants signed written consent to participate. ~~A plan for compensation~~  
24  
25 156 ~~was incorporated into the study design to maximize return for 12-month follow-up.~~ Demographic  
26  
27 157 data for each of the residents were collected, including level of training, department, age, sex,  
28  
29 158 race, and handedness. ~~The~~ survey questions were designed to determine residents' prior  
30  
31 159 exposure to NSIs and to evaluate their prior knowledge of and experience with the StatLock  
32  
33 160 device.

34  
35  
36  
37 161 ~~Each resident was randomly assigned to either a simulation curriculum or to a standard~~  
38  
39 162 ~~curriculum educational program to familiarize them with the SED device application, and all~~  
40  
41 163 ~~agreed to return in 12 months for a repeat questionnaire. The endpoint for the longitudinal~~  
42  
43 164 ~~phase of the study was defined as a difference in NSIs between the groups. This portion of the~~  
44  
45 165 ~~study is still in progress.~~

46  
47  
48 166 Finally, a focus group of six randomly selected residents was conducted to assess impressions  
49  
50 167 of the device and to identify potential barriers to its implementation. Participants were  
51  
52 168 interviewed by a study investigator (SG) individually and each session was audio recorded with  
53  
54 169 the permission of the participant. During the focus group sessions, participants were asked to  
55  
56 170 discuss their impressions of the SED, and additional thoughts they had on the use of this  
57  
58  
59  
60

1  
2  
3 171 alternative method as compared to traditional sutures when securing central lines. These  
4  
5 172 discussions were recorded so that they could be later analyzed by two independent study  
6  
7 173 investigators (SG and AB).  
8  
9

10 174

## 11 12 13 175 **Data analysis**

14  
15 176 De-identified data on all NSIs occurring at our institution were independently reviewed by three  
16  
17 177 study investigators (SG, AB, CR). All reported NSIs were reviewed and characterized according  
18  
19 178 to occupation of the HCW incurring the injury ([Figure 2](#)) and according to circumstances  
20  
21 179 regarding the injury. ~~Frequency counts of NSIs were tabulated (Figures 2 and 3).~~ Frequency  
22  
23 180 counts of physician NSIs that occurred during a catheter placement such as a CVC, large bore  
24  
25 181 single lumen catheter, dialysis catheter, or arterial catheter line were also reviewed by the same  
26  
27 182 three investigators and compared for agreement in interpretation. After the focus group  
28  
29 183 sessions, two independent study investigators categorized the residents' statements as neutral,  
30  
31 184 positive, or negative observations regarding the StatLock device.  
32  
33  
34

35 185

## 36 37 186 **RESULTS**

### 38 39 187 **Retrospective institutional data analysis**

40  
41  
42 188 Analysis of the retrospective NSI data revealed that physicians (residents, fellows, and  
43  
44 189 attendings) accounted for 43% (136 of 314) of the total NSIs occurring between July 2007 and  
45  
46 190 ~~June~~ 2011 ([Figure 2](#)). ~~Resident NSIs accounted for Resident NSIs accounted for~~ 87% (118 of  
47  
48 191 136) of the total physician NSIs ~~(118 residents, 13 fellows, and 5 attending physicians)~~  
49  
50 192 occurring during this 4-year period. Analysis of the circumstances surrounding each NSI  
51  
52 193 showed that 40 NSIs ~~Thirty-one percent of the resident/fellow NSIs injuries (40 of 131)~~ occurred  
53  
54 194 during the placement of CVCs or other catheter lines that required securement to patient skin.  
55  
56  
57  
58  
59  
60

1  
2  
3 195 Fifty-three percent (21 of 40) of the NSIs that occurred during these procedures occurred  
4  
5 196 specifically while the line was being secured to the patient's skin with a suture needle. This  
6  
7 197 accounted for 16% (21 of 131) of the total number of resident and fellow NSIs over the 4-year  
8  
9 198 period. It is possible that 13 additional NSIs occurred during securement of these catheter lines,  
10  
11 199 but unless our occupational health record specifically documented that the NSI occurred while  
12  
13  
14 200 the worker was securing the line to the patient's skin, those data were not included. The  
15  
16 201 remaining six NSIs that occurred during placement of a CVC or other invasive catheter. An  
17  
18 202 additional six NSIs occurred with the large-bore needle while the physician worker was  
19  
20  
21 203 attempting to cannulate the vessel.  
22  
23  
24 204

## 25 26 205 **Cost analysis**

27  
28 206 Given the number of NSIs determined from retrospective analysis, we calculated that use of a  
29  
30 207 needleless device to secure the CVC could have prevented ~~these~~ 21 NSIs. The cost analysis  
31  
32 208 estimates that each NSI incurs at least \$2,723 USD in charges at this institution. each costing an  
33  
34 209 estimated \$922 (average NSI cost incurred at this institution). Costs associated with an NSI  
35  
36 210 include provider fees for initial and follow-up visits, blood draw and analysis costs, medication  
37  
38 211 costs, and administrative costs. Table 1 lists the minimal charges associated with a low risk NSI  
39  
40 212 using data from our institution's Occupational Health Clinic. While the calculations for this  
41  
42 213 study represent the lowest possible cost of a NSI, the actual cost of a NSI varies from case to  
43  
44 214 case depending on the circumstances surrounding the NSI, the treatment plan, medication  
45  
46 215 requirements, and frequency of follow-up visits. If the HCW has a high risk exposure to HIV,  
47  
48 216 prophylactic antiviral medications must be prescribed and the cost of the medications, additional  
49  
50 217 labwork, and frequent followup visits increases the cost of the NSI significantly. The cost  
51  
52 218 estimates also do not include the indirect cost of time lost from work and other indirect financial  
53  
54 219 and social costs. Eliminating all 21 NSIs that definitively occurred during securement of a  
55  
56  
57  
58  
59  
60

1  
2  
3 220 CVCline would have translated into a direct cost savings of at least \$57,183 in USD  
4  
5 221 charges \$19,362. If the possible additional 13 NSIs also that possibly occurred during the  
6  
7 222 securement phase where three sharps are included in the calculation (hollow bore needle for  
8  
9 223 repeat anesthesia, suture needle, and scalpel), were also prevented, the cost savings would be  
10  
11 224 at least this would translate to a direct cost savings of \$31,348 \$92,582 over the 4-year period.  
12  
13  
14  
15  
16

### 226 Enrollment survey of residents enrolled into the longitudinal study

17  
18  
19 227 The prospective portion of the study surveyed 95 residents. Only Of the 95 residents surveyed,  
20  
21 228 only 30% had previous knowledge of the needleless SED that is supplied in all CVC safety kits  
22  
23 229 at our institution. Only 19% had ever had training regarding the use of any SED or used the  
24  
25 230 device in clinical practice. Twenty-seven percent of residents surveyed stated that they had had  
26  
27 231 at least one close call needlestick incident in the past 2 months. And 20% of the residents  
28  
29 232 surveyed had at least two near miss/close call needlestick incident in the past 2 months. (Figure  
30  
31 233 4). Twenty-five percent of responding residents (24 of 95) answered yes when asked the  
32  
33 234 question, "Have you ever had a needlestick injury associated with patient body fluid exposure?"  
34  
35 235 In a follow-up question, we asked, "Did you report the incident each time?" Twenty-one percent  
36  
37 236 (5 of 24) responded that they did not always report NSI. This finding is consistent with prior data  
38  
39 237 suggesting that HCW NSIs are underreported<sup>3-6</sup>. Forty-nine percent of residents surveyed  
40  
41 238 stated that they had had at least one near miss/ close call needlestick incident in the past 2  
42  
43 239 months (Figure 4).  
44  
45  
46  
47  
48  
49  
50

### 241 **Focus group data**

51  
52  
53 242 Data from discussions with six randomly selected study participants are presented in Table 2.  
54  
55 243 Statements regarding each residents' experience with Statlock were categorized into positive,  
56  
57  
58  
59  
60

1  
2  
3 244 negative, or neutral. Opinions of the SED and experiences varied across participants. In  
4  
5 245 general, those residents who were comfortable and adept at suturing, especially surgical  
6  
7 246 residents, seemed to prefer using sutures over the Statlock device. According to the responses,  
8  
9  
10 247 the use of the SED may also be dependent on patient characteristics, situational circumstances,  
11  
12 248 and knowledge or acceptance of the SED by other HCWs. One resident indicated that she  
13  
14 249 would want additional practice with the device before using it in a clinical setting, suggesting that  
15  
16 250 additional training may encourage increased use of the SED.

17  
18  
19 251 ~~Focus group discussions were conducted with six randomly selected study participants.~~  
20  
21 252 ~~Participants were interviewed by a study investigator (SG) individually and each session was~~  
22  
23 253 ~~audio recorded with the permission of the participant. Focus group sessions lasted an average~~  
24  
25 254 ~~of 30 minutes to discuss participant use of the StatLock device, their impressions of the SED,~~  
26  
27 255 ~~and additional thoughts they had on the use of StatLock over traditional sutures when securing~~  
28  
29 256 ~~central lines. Audio data were extracted and analyzed by two independent study investigators~~  
30  
31 257 ~~(SG and AB). Focus group data are presented in Table 1.~~

32  
33  
34 258  
35  
36  
37 259 ~~Responses varied across participants. One surgery resident noted that surgeons especially are~~  
38  
39 260 ~~more familiar with suturing than with applying StatLock and may be able to secure a CVC faster~~  
40  
41 261 ~~using sutures. The resident stated, "Time is of the essence. [I] don't want to wait for StatLock to~~  
42  
43 262 ~~dry when sutures are faster, more efficient, more comfortable." Another resident who is also~~  
44  
45 263 ~~comfortable and adept at suturing lines mentioned that she would want more practice with~~  
46  
47 264 ~~applying the StatLock device before using it in a clinical setting.~~

48  
49  
50 265  
51  
52  
53 266 ~~One emergency medicine resident described himself as "motivated to use StatLock after~~  
54  
55 267 ~~witnessing multiple coworkers experience fingersticks." After using the StatLock device just one~~  
56  
57 268 ~~time, he found the placement of the StatLock device was quicker than suturing the CVC.~~

269  
270 ~~Two of the six residents reported that they valued the StatLock device in certain situations when~~  
271 ~~they were more likely to incur an NSI, such as when the patient is unpredictable or unwilling to~~  
272 ~~lie still. One resident reported that in such cases it is “beneficial to use as few sharps as~~  
273 ~~possible.”~~

274  
275 ~~Half of the residents were hesitant to use StatLock in certain circumstances because they~~  
276 ~~thought that the nurses and other practitioners lacked knowledge about the device. After~~  
277 ~~securing a CVC using StatLock in the emergency department, one resident reported, “The~~  
278 ~~admitting team was confused, did not know what the device was, and [was] concerned over~~  
279 ~~whether StatLock would stay in place.”~~

280  
281 ~~One resident pointed out that the StatLock device may be beneficial in certain populations of~~  
282 ~~patients. “[StatLock would be] beneficial cosmetically when placing an upper neck line next to~~  
283 ~~the face, especially for patients who form keloids.”~~

284  
285 ~~Audio-recorded focus group text was transcribed and data were extracted and categorized as~~  
286 ~~neutral, positive or negative observations regarding the StatLock device.~~

287

## 288 **DISCUSSION**

289 In 2009 we developed a partnership with our institutional industrial hygienist to investigate  
290 opportunities to reduce NSIs among resident physicians in our institution. In the fiscal year  
291 between 2008 and 2009, nurse NSIs increased 10% and physician NSIs increased 70% at our

1  
2  
3 292 institution. In 2009 at HUH, 46% of the total reported NSIs involved residents. A 2007 study of  
4  
5 293 699 surgical residents at 17 US medical centers found that by the 5<sup>th</sup> year of residency, 99%  
6  
7 294 had had at least one NSI. Moreover, for 53% of respondents, the NSI had involved a high-risk  
8  
9  
10 295 patient with a history of HIV infection, hepatitis B or C virus infection, or injection drug use.<sup>2</sup> In  
11  
12 296 2009, our US-based urban hospital reported 27.6 injuries per 100 occupied beds, which is  
13  
14 297 above the EPINet average of 20.1 for teaching hospitals<sup>7</sup>. Despite increased awareness of  
15  
16 298 sharps injuries and some attempts at prevention, NSIs continue to be a serious problem. Our  
17  
18 299 study supported earlier research findings that among HCWs, physicians have the highest risk of  
19  
20 300 NSI<sup>2, 10</sup>, and among physicians, residents have a three times greater risk of blood and body  
21  
22 301 fluids exposure than senior doctors<sup>11</sup>. These data were alarming and required immediate  
23  
24 302 analysis for the potential for intervention.  
25  
26  
27  
28 303  
29  
30 304 In medicine, engineering controls that have been introduced to decrease the incidence of NSIs  
31  
32 305 among HCWs include safety-winged steel needles, safety intravenous catheter insertion  
33  
34 306 needles, polyester film-coated capillary tubes, safety-shielded phlebotomy needles, needleless  
35  
36 307 blood transfer devices, safety peripherally inserted central catheter stylets, blood gas needle-  
37  
38 308 holding devices, blunt-tip needles, and shielded hypodermic needles/syringes<sup>8</sup>. Current  
39  
40 309 literature indicates that 29% to 35% of reported occupational NSIs could have been prevented if  
41  
42 310 an SED had been used<sup>9</sup>. Although engineering controls may require capital investment, the  
43  
44 311 cost savings resulting from improved safety may justify the expense. However, devices that  
45  
46 312 depend on user activation generate benefit only when correctly used; thus HCWs must be  
47  
48 313 educated in their use.  
49  
50  
51  
52 314  
53  
54  
55 315 For some HCW their lack of training and their unfamiliarity with SEDs is a major barrier to its  
56  
57 316 use. ~~The StatLock SED secures CVCs using a locking device attached to the skin using~~  
58  
59  
60



1  
2  
3 317 ~~benzoin adhesive instead of the traditional method of using sharps. Traditionally, after a CVC is~~  
4  
5 318 ~~placed the patient may require additional local anesthesia in a site separate from the insertion~~  
6  
7 319 ~~site, necessitating the use of a hollow bore needle. A CVC is secured with the use of a straight~~  
8  
9 320 ~~suture needle and the suture is cut with a scalpel. Therefore, using the SED minimizes the risk~~  
10  
11 321 ~~of NSI during securement of CVC by eliminating three steps in which sharps are used. Despite~~  
12  
13 322 ~~the easy availability of the StatLock device, few resident physicians are aware of it and fewer~~  
14  
15 323 ~~still have used it in clinical practice.~~ Only 30% in our study had previous knowledge of the  
16  
17 324 needleless SED that is supplied in all CVC safety kits at our institution. Only 19% had ever used  
18  
19 325 the device in clinical practice. Exposure to the SED and effective training may encourage the  
20  
21 326 use of SEDs and subsequently reduce NSI. A prospective cohort study using the same 95  
22  
23 327 residents who participated in this survey has been designed to determine the best means of  
24  
25 328 educating residents on the use of the Statlock device. Each resident was randomly assigned to  
26  
27 329 either a standard teaching video or a simulation curriculum involving both the video teaching  
28  
29 330 plus hands-on practice in a simulated clinical environment. The endpoint for the longitudinal  
30  
31 331 phase of the study was defined as a difference in NSIs between the groups. Additionally, all  
32  
33 332 participants agreed to return in 12 months for a repeat questionnaire on their attitudes and  
34  
35 333 experience with the SED. This portion of the study is still in progress. ~~Despite increased~~  
36  
37 334 ~~awareness of sharps injuries and some attempts at prevention, NSIs continue to be a serious~~  
38  
39 335 ~~problem. Our study supported earlier research findings that among HCWs, physicians have the~~  
40  
41 336 ~~highest risk of NSI<sup>2,10</sup>, and among physicians, residents have a three times greater risk of blood~~  
42  
43 337 ~~and body fluids exposure than senior doctors<sup>14</sup>.~~

44  
45  
46  
47  
48 338  
49  
50  
51 339 In our institution, some physicians-residents who are already familiar with Statlock have been  
52  
53 340 reluctant to use ~~it~~ the StatLock device because they have questions about efficacy and patient  
54  
55 341 safety. Some express concern that the device might not work as well as the traditional method  
56  
57 342 of securing a CVC to patients' skin using sutures. Many reports in the literature have been  
58  
59  
60

1  
2  
3 343 authored by individuals associated with the manufacturers, raising the question of potential bias.

4  
5 344 The StatLock device is currently available in every triple-lumen CVC kit in our institution.

6  
7 345 Therefore, the issue of use of the device does not rest on its availability, but rather on physician

8  
9 346 awareness, training, and preference.

10  
11 347

12  
13  
14 348 Focus group discussions revealed that such factors have indeed presented barriers to

15  
16 349 implementation of the ~~StatLock device~~. Residents expressed concern regarding time

17  
18 350 constraints and familiarity with device. Previous literature has documented similar barriers to

19  
20 351 implementation. Cost, personnel time, and resistance to change are several of the most

21  
22 352 commonly documented deterrents.<sup>6, 12-16</sup> Surgeons and anesthesiologists have been

23  
24 353 recognized as the cohorts least likely to use safety devices designed to prevent NSIs,

25  
26 354 presumably because they are skilled at suturing.<sup>17</sup> Reluctance may also stem from feelings of

27  
28 355 discomfort and questions of efficacy.<sup>17</sup> Evidence-based reasoning is often absent from the

29  
30 356 foundation of implementation programs, exacerbating opposition to change.<sup>18</sup> Perpetual access

31  
32 357 to conventional sharps also hinders implementation of safety devices.<sup>19</sup>

33  
34 358

35  
36 359 Some institutions have recognized that simple logistics can prevent staff from using safety-

37  
38 360 engineered devices. Contractual purchasing agreements can render devices unavailable and

39  
40 361 certain devices may not be compatible with existing equipment<sup>6, 16</sup>. The overabundance of SEDs

41  
42 362 on the market makes it difficult for institutions to choose<sup>15</sup>, yet most devices are not applicable

43  
44 363 for all situations and technology must become more advanced to meet the remaining

45  
46 364 demand.<sup>15,18</sup>

47  
48 365

49  
50 366 Lastly, HCWs are characterized as being desensitized to disease and consequently possessing

51  
52 367 a false sense of security regarding the effects of NSIs.<sup>17</sup> When this complacency is coupled

53  
54

55  
56

57  
58

59  
60

1  
2  
3 368 with a lack of multidisciplinary support, both “horizontally and vertically,” implementation of  
4  
5 369 safety devices becomes extremely difficult.<sup>20</sup>  
6  
7  
8 370

## 9 371 **CONCLUSIONS**

10 372 The common incidence of ~~NSIs-needlestick injuries~~ among healthcare workers clearly indicates  
11  
12 373 a need for further intervention. ~~Retrospective analysis of institutional records demonstrated that~~  
13  
14 374 ~~over a 4-year period (July 2007–June 2011), 16% of resident/fellow NSIs (21 of 131) could have~~  
15  
16 375 ~~been avoided with the use of a needleless securement device such as the Statlock device.~~  
17  
18 376 ~~Engineering controls such as While such SEDsneedleless securement devices~~ are currently  
19  
20 377 available, ~~they are infrequently used by HCWs for various reasons. -and can be used as an~~  
21  
22 378 ~~alternative to sharps. Retrospective analysis of institutional records demonstrated that over a 4-~~  
23  
24 379 ~~year period (July 2007–July 2011), 16% of resident/fellow NSIs (21 of 131) could have been~~  
25  
26 380 ~~avoided with the use of a safety-engineered device such as the Statlock device to secure a~~  
27  
28 381 ~~CVC. The implementation of an SED in an institution requires proof of safety and efficacy as well~~  
29  
30 382 ~~education and training of healthcare workers to encourage the use of the device andIf safety and~~  
31  
32 383 ~~efficacy of the device can be demonstrated, then implementation of such devices may~~  
33  
34 384 ~~significantly~~ reduce the number of ~~NSIsneedlestick injuries~~ among physicians. ~~However,~~  
35  
36 385 ~~education alone will not be sufficient to overcome barriers to implementation.~~  
37  
38  
39  
40  
41  
42 386  
43  
44 387

## 46 388 **Funding**

47  
48 389 This study was supported by Drexel College of Medicine IBC Simulation Grant Funding. The  
49  
50 390 funding source had no involvement in the study design; collection, analysis or interpretation  
51  
52 391 data; writing of the report; nor the decision to submit the paper for publication.  
53  
54  
55 392

## 57 393 **Contributorship**

1  
2  
3 394 Dr Griswold-Theodorson had access to and takes responsibility for the integrity of the data and the  
4  
5 395 accuracy of the data analysis. Dr Griswold-Theodorson: contributed to study conception and design,  
6  
7  
8 396 data collection, analysis and interpretation of the data, drafting of the manuscript, and critical revision  
9  
10 397 of the article for important intellectual content.

11  
12 398 Ms Bonaroti: contributed to study design, data collection, data analysis and interpretation, reviewing  
13  
14 399 and editing of the manuscript, and critical revision of the article for important intellectual content.

15  
16  
17 400 Mr Rieder: contributed to study design, data collection and analysis, review and editing of the  
18  
19 401 manuscript.

20  
21 402 Mr Erbayri: contributed to study design, data collection and analysis, review and editing of the  
22  
23 403 manuscript.

24  
25  
26 404 Dr Parsons: contributed to study design, data collection, data analysis and interpretation, reviewing,  
27  
28 405 editing, and section writing of the manuscript.

29  
30  
31 406 Dr Nocera: contributed to study design, data collection and data interpretation, reviewing, editing,  
32  
33 407 section writing of the manuscript and critical revision of the article for important intellectual content.

34  
35 408 Dr Hamilton: contributed to interpretation of the data, reviewing, and editing of the manuscript and  
36  
37 409 critical revision of the article for important intellectual content.

38  
39  
40 410

#### 41 411 **Data Sharing**

42  
43  
44 412 There is no additional unpublished data.

#### 45 46 47 413 **Competing Interests**

48  
49  
50 414 None

51  
52  
53  
54 415

1  
2  
3 416 Figure 1. Right infraclavicular subclavian triple-lumen catheter secured with StatLock needleless  
4  
5 417 device (Bard Access Systems, Salt Lake City, UT). The StatLock needleless device replaces  
6  
7 418 the need for suturing with a locking device secured with benzoin and tape.  
8  
9

10 419 Figure 2. NSI injury at Hahnemann Hospital by occupation from four year period: July 1, 2007 to  
11  
12 420 June 30, 2011. MD includes residents, attendings, and fellows. Nurse: includes nurses, nurse  
13  
14 421 anesthesia, and nurse practitioners. Others include respiratory therapy, environmental services,  
15  
16 422 laboratory personnel and others not categorized above.  
17  
18

19  
20 423 ~~Figure 3. Needlestick injuries while inserting CVC or other invasive catheter requiring sutures at~~  
21  
22 424 ~~Hahnemann University Hospital for the 4 year period July 1, 2007 to June 30, 2011.~~  
23

24 425 Figure 4.3. Close calls involving needlestick injuries witnessed in the 2 months preceding survey  
25  
26 426 administration in July 2011.  
27  
28

29 427 Table 1. Minimal charges associated with a low risk needlestick injury at Hahnemann Hospital.  
30

31  
32 428 Table 24. Data extracted from discussions with six randomly selected focus group participants.  
33  
34  
35 429

## 430 References

- 431
- 432 1. Consensus Statement and Call to Action on Sharps Safety released March 2012: International  
433 Healthcare Worker Safety Center, 2012.  
434 <http://www.healthsystem.virginia.edu/pub/epinet/home.html>. Retrieved November 1, 2012.
- 435 2. Makary MA, Al-Attar A, Holzmüller CG, et al. Needlestick injuries among surgeons in training. *New  
436 England Journal of Medicine* 2007;356(26):2693-9.
- 437 3. Elliott SKF, Keeton A, Holt A. Medical students' knowledge of sharps injuries. *Journal of Hospital  
438 Infection* 2005;60(4):374-77.
- 439 4. Yamamoto AJ, Solomon JA, Soulen MC, et al. Sutureless Securement Device Reduces Complications of  
440 Peripherally Inserted Central Venous Catheters. *Journal of Vascular and Interventional Radiology*  
441 2002;13(1):77-81.
- 442 5. Trim JC, Elliott TSJ. A review of sharps injuries and preventative strategies. *Journal of Hospital  
443 Infection* 2003;53(4):237-42.
- 444 6. (OSHA) OSHA. Record Summary of the Request for Information on Occupational Exposure to  
445 Bloodborne Pathogens. In: Labor USDo, editor, 1999.
- 446 7. EPINet. <http://healthsystem.virginia.edu/internet/epinet/EPINet-2007-rates.pdf>, 2007. Retrieved  
447 October 10, 2012.
- 448 8. Dement JM, Epling C, Østbye T, et al. Blood and body fluid exposure risks among health care workers:  
449 Results from the Duke Health and Safety Surveillance System. *American Journal of Industrial  
450 Medicine* 2004;46(6):637-48.
- 451 9. Elder A, Paterson C. Sharps injuries in UK health care: a review of injury rates, viral transmission and  
452 potential efficacy of safety devices. *Occupational Medicine* 2006;56(8):566-74.

- 1  
2  
3 453 10. Wicker S, Jung J, Allwinn R, et al. Prevalence and prevention of needlestick injuries among health  
4  
5 454 care workers in a German university hospital. *International Archives of Occupational and*  
6  
7 455 *Environmental Health* 2008;81(3):347-54.  
8  
9  
10 456 11. Naghavi SHR, Sanati KA. Accidental blood and body fluid exposure among doctors. *Occupational*  
11  
12 457 *Medicine* 2009;59(2):101-06.  
13  
14 458 12. Sharps Injuries Among Medical Trainees. In: Occupational Health Surveillance Program MDoPH,  
15  
16 459 editor. Boston, 2011.  
17  
18 460 [http://www.mass.gov/Eeohhs2/docs/dph/occupational\\_health/injuries\\_medical\\_trainees\\_02\\_0](http://www.mass.gov/Eeohhs2/docs/dph/occupational_health/injuries_medical_trainees_02_0)  
19  
20 461 9.pdf. Retrieved November 1, 2012.  
21  
22 462 13. Jagger J, Perry J, Goma A, et al. The impact of U.S. policies to protect healthcare workers from  
23  
24 463 bloodborne pathogens: The critical role of safety-engineered devices. *Journal of Infection and*  
25  
26 464 *Public Health* 2008;1(2):62-71.  
27  
28  
29 465 14. Vason BJ. The safety needle switchover, part 1 of 2. *Nursing Management* 2002;33(5):33-6.  
30  
31 466 15. Pegues DAMD. Building Better Programs to Prevent Transmission of Blood-Borne Pathogens to  
32  
33 467 Healthcare Personnel: Progress in the Workplace, But Still No End in Sight •. *Infection Control*  
34  
35 468 *and Hospital Epidemiology* 2003;24(10):719-21.  
36  
37 469 16. Sohn SMPH, Eagan JRN, Sepkowitz KAMD, et al. Effect of Implementing Safety-Engineered Devices  
38  
39 470 on Percutaneous Injury Epidemiology. *Infection Control and Hospital Epidemiology*  
40  
41 471 2004;25(7):536-42.  
42  
43 472 17. Guglielmi CL, Spratt DG, Berguer R, et al. A Call to Arms to Prevent Sharps Injuries in Our ORs.  
44  
45 473 *Association of Operating Room Nurses. AORN Journal* 2010;92(4):387-92.  
46  
47 474 18. Hall J. Worker safety: A road well-traveled, yet so far to go. *Healthcare Purchasing News*  
48  
49 475 2003;27(8):46-46.  
50  
51  
52  
53  
54  
55  
56  
57  
58  
59  
60

1  
2  
3  
4  
5  
6  
7  
8  
9  
10  
11  
12  
13  
14  
15  
16  
17  
18  
19  
20  
21  
22  
23  
24  
25  
26  
27  
28  
29  
30  
31  
32  
33  
34  
35  
36  
37  
38  
39  
40  
41  
42  
43  
44  
45  
46  
47  
48  
49  
50  
51  
52  
53  
54  
55  
56  
57  
58  
59  
60

476 19. AORN. Seeking solutions to increase sharps safety. *Association of Operating Room Nurses Journal*  
477 2011;94(6):C1-C1,C8,C9.  
478 20. Hagstrom AM. Perceived Barriers to Implementation of a Successful Sharps Safety Program.  
479 *Association of Operating Room Nurses. AORN Journal* 2006;83(2):391-7.

480

For peer review only
